1 **Title**

2 Two cyclic electron flows around photosystem I differentially participate in C<sub>4</sub> photosynthesis

3

4 **All author names and affiliations**

5 Takako Ogawa<sup>1,a</sup>, Kana Kobayashi<sup>1</sup>, Yukimi Y. Taniguchi<sup>1</sup>, Toshiharu Shikanai<sup>2</sup>, Naoya Nakamura<sup>3</sup>, Akiho  
6 Yokota<sup>3</sup> and Yuri N. Munekage<sup>1\*</sup>

7 <sup>1</sup>School of Science and Technology, Kwansei Gakuin University, 2-1 Gakuen, Sanda, Hyogo, 669-1337, Japan

8 <sup>2</sup>Graduate School of Science, Kyoto University, Kitashirakawa-Oiwakecho, Sakyo, Kyoto, 606-8502, Japan

9 <sup>3</sup>Graduate School of Biological Sciences, Nara Institute of Science and Technology, 8916-5 Takayama, Ikoma,  
10 Nara, 630-0192, Japan

11 <sup>a</sup>Present address: Faculty of Education and Integrated Arts and Sciences, Waseda University, 2-2 Wakamatsu-  
12 cho, Shinjuku-ku, Tokyo 162-8480, Japan

13

14 **Author for contact**

15 Name: Yuri N. Munekage

16 Mailing address: 2-1 Gakuen, Sanda, Hyogo, 669-1337, Japan

17 Phone number: +81-79-565-7030

18 E-mail address: munekage@kwansei.ac.jp

19

20 **Short running head**

21 PSI cyclic electron flow in C<sub>4</sub> plants

22 **Abstract**

23 C<sub>4</sub> plants assimilate CO<sub>2</sub> more efficiently than C<sub>3</sub> plants because of their C<sub>4</sub> cycle that concentrates  
24 CO<sub>2</sub>. However, the C<sub>4</sub> cycle requires additional ATP molecules, which may be supplied by the cyclic electron  
25 flow around photosystem I. One cyclic electron flow route, which depends on a chloroplast NADH  
26 dehydrogenase-like (NDH) complex, is suggested to be crucial for C<sub>4</sub> plants despite the low activity in C<sub>3</sub>  
27 plants. The other route depends on proton gradient regulation 5 (PGR5) and PGR5-like photosynthetic  
28 phenotype 1 (PGRL1), which is considered a major cyclic electron flow route to generate the proton gradient  
29 across the thylakoid membrane in C<sub>3</sub> plants. However, its contribution to C<sub>4</sub> photosynthesis is still unclear. In  
30 this study, we investigated the contribution of the two cyclic electron flow routes to the NADP-malic enzyme  
31 subtype of C<sub>4</sub> photosynthesis in *Flaveria bidentis*. We observed that the suppression of the NDH-dependent  
32 route drastically delayed growth and decreased the CO<sub>2</sub> assimilation rate to approximately 30% of the wild-  
33 type rate. On the other hand, the suppression of the PGR5/PGRL1-dependent route did not affect plant growth  
34 and resulted in a CO<sub>2</sub> assimilation rate that was approximately 80% of the wild-type rate. Our data indicate  
35 that the NDH-dependent cyclic electron flow substantially contributes to the NADP-malic enzyme subtype of  
36 C<sub>4</sub> photosynthesis and that the PGR5/PGRL1-dependent route cannot complement the NDH-dependent route  
37 in *F. bidentis*. These findings support the fact that during the C<sub>4</sub> evolution, the photosynthetic electron flow  
38 may be optimized to provide the energy required for C<sub>4</sub> photosynthesis.

## 39 Introduction

40 Photosynthetic organisms assimilate CO<sub>2</sub> via the Calvin-Benson cycle using ATP and NADPH  
41 produced by photosynthetic electron transport. Linear electron flow (LEF) is driven by photosystem II (PSII)  
42 and photosystem I (PSI) and produces both ATP and NADPH. On the other hand, cyclic electron flow (CEF)  
43 around PSI generates the proton gradient ( $\Delta\text{pH}$ ) across the thylakoid membrane by recycling electrons from  
44 the acceptor side of PSI to plastoquinone (PQ) and contributes to the production of only ATP. CEF is  
45 important for the regulation of ATP/NADPH production ratio in chloroplasts because ATP/NADPH  
46 production by LEF is fixed and insufficient for consumption by CO<sub>2</sub> assimilation via the Calvin-Benson cycle  
47 and photorespiration (Allen, 2003).

48 CEF has been suggested to be important for C<sub>4</sub> plants because they require additional ATP to drive  
49 CO<sub>2</sub> concentrating mechanism, called the C<sub>4</sub> cycle (Hatch, 1987; Kanai and Edwards, 1999; Munekage,  
50 2016). C<sub>4</sub> plants have evolved from C<sub>3</sub> plants in multiple lineages in the angiosperm over the past 30 million  
51 years (Sage et al., 2012). With the exception of single-cell C<sub>4</sub> photosynthesis, the C<sub>4</sub> plants concentrate CO<sub>2</sub>  
52 around ribulose-1,5-bisphosphate carboxylase/oxygenase (RuBisCO) by C<sub>4</sub> cycle that exchanges four carbon  
53 inorganic acids and three carbon inorganic acids between two distinct photosynthetic cells, mesophyll cells  
54 (MCs) and bundle sheath cells (BSCs). In the C<sub>4</sub> cycle, CO<sub>2</sub> is first converted to HCO<sub>3</sub><sup>-</sup> by carbonic  
55 anhydrase, which is then fixed to phosphoenolpyruvate to form oxaloacetic acid by phosphoenolpyruvate  
56 carboxylase (PEPC) in MCs. The generated oxaloacetic acid is converted to malate or aspartate, which diffuse  
57 via plasmodesmata into BSCs, where RuBisCO is located, and decarboxylated to release CO<sub>2</sub> (Hatch, 1987).  
58 Three biochemical subtypes of C<sub>4</sub> species have been classified based on which of the three enzymes, NADP-  
59 malic enzyme (NADP-ME), NAD-malic enzyme (NAD-ME) or phosphoenolpyruvate carboxykinase (PEP-  
60 CK), are primarily responsible for C<sub>4</sub> acids decarboxylation in BSCs (Hatch, 1987; Furbank, 2011). In plants  
61 using the C<sub>4</sub> pathway of the NADP-ME or NAD-ME subtypes, the ATP/NADPH demand for CO<sub>2</sub> fixation  
62 rises to 2.5 because two molecules of ATP are required for regeneration of phosphoenolpyruvate in addition to  
63 the three molecules of ATP and two molecules of NADPH required for the Calvin-Benson cycle, whereas in  
64 plants with C<sub>3</sub> photosynthesis, the ATP/NADPH demand ranges between 1.55 and 1.67, depending on  
65 photorespiration (Kanai and Edwards, 1999; Osmond, 1981). Furthermore, in the C<sub>4</sub> pathway of the NADP-  
66 ME subtype, NADPH is generated at the step of decarboxylation of malate in BSC. As a result, in the NADP-  
67 ME subtype C<sub>4</sub> species, the ATP/NADPH demand rises in BSC, but in the NAD-ME subtype C<sub>4</sub> species, it  
68 rises in MC. Thus, the balance between LEF and CEF activities differs depending on the subtype and the cell  
69 type. Indeed, downregulation of LEF associated with the absence or reduction of grana stacks in chloroplasts  
70 of BSC was observed in a number of the NADP-ME subtype C<sub>4</sub> species, including monocot and eudicot  
71 (Andersen et al., 1972; Dengler and Nelson, 1999; Höfer et al., 1992; Woo et al., 1970).

72 Two CEF routes around PSI have been identified in land plants. One route depends on a chloroplast  
73 NADH dehydrogenase-like (NDH) complex, which comprises plastid-encoded subunits (NdhA-K) and more  
74 than 19 nuclear-encoded subunits, including NdhL-O specific to photosynthetic NDH (Peltier et al., 2016).  
75 Recent studies revealed that the NDH-dependent CEF mediates the transfer of electrons from ferredoxin to PQ  
76 (Yamamoto and Shikanai, 2013; Schuller et al., 2019). The other route depends on a proton gradient

77 regulation 5 (PGR5)/PGR5-like photosynthetic phenotype 1 (PGRL1) heterodimer, which is also involved in  
78 transferring electrons from ferredoxin to PQ (Munekage et al., 2002; DalCorso et al., 2008; Hertle et al.,  
79 2013). These CEF routes are important not only for elevating ATP/NADPH production ratio but also for  
80 protecting photosystems from photodamage. The PGR5/PGRL1-dependent route is reported to be involved in  
81  $\Delta$ pH-dependent regulation of light energy absorption at PSII, detected as nonphotochemical quenching of  
82 chlorophyll fluorescence (NPQ). It is also reported that PGR5/PGRL1-dependent CEF is important to prevent  
83 PSI over-reduction by limiting electron transport at cytochrome *b<sub>6</sub>f* complexes under strong or fluctuating-  
84 light conditions in *Arabidopsis thaliana* and *Oryza sativa* (Munekage et al., 2002, 2004; Suorsa et al., 2012;  
85 Yamori et al., 2016). The NDH-dependent route is also believed to act as a safety valve to prevent the stromal  
86 over-reduction under stress conditions such as strong light and low temperature (Endo et al., 1999; Yamori et  
87 al., 2011), but impairment of NPQ induction or growth defect under fluctuating light conditions is not  
88 observed in NDH deficient C<sub>3</sub> plants except for *Oryza sativa* (Munekage et al., 2004; Yamori et al., 2016;  
89 Suorsa et al., 2012). Thus, the PGR5/PGRL1-dependent route is considered to substantially contribute to the  
90 CEF activity, whereas the NDH-dependent route is a minor route in C<sub>3</sub> plants.

91 Although the NDH-dependent route is less important in C<sub>3</sub> plants, several reports suggest the  
92 importance of the NDH-dependent route in C<sub>4</sub> plants (Takabayashi et al., 2005; Nakamura et al., 2013).  
93 Abundance of NDH subunits was cell-selectively increased, corresponding to the ATP/NADPH demand in  
94 some NADP-ME or NAD-ME subtype C<sub>4</sub> species (Takabayashi et al., 2005; Nakamura et al., 2013).  
95 Furthermore, Peterson et al. (2016) showed that the net CO<sub>2</sub> assimilation rate was decreased by one-half in the  
96 transposon insertion lines of *NdhN* or *NdhO* in *Zea mays*, which is an NADP-ME subtype C<sub>4</sub> species of  
97 monocots. Ishikawa et al. (2016) also observed that the *NdhN*-knockdown line of *Flaveria bidentis*, an  
98 NADP-ME subtype C<sub>4</sub> eudicot species, exhibited poor growth under low light conditions, despite relatively  
99 mild and largely recovered phenotype under medium light conditions. These reports suggest the importance of  
100 the NDH-dependent route for supplying additional ATP in NADP-ME subtype C<sub>4</sub> species. On the other hand,  
101 the extent to which PGR5/PGRL1-dependent  $\Delta$ pH generation contributes to C<sub>4</sub> photosynthesis remains  
102 unclear. Although abundances of PGR5 and PGRL1 were equal between MC and BSC regardless of the  
103 ATP/NADPH demand (Takabayashi et al., 2005; Nakamura et al., 2013), not only the abundance of NDH but  
104 also that of PGR5 or PGRL1 was higher in C<sub>4</sub> species than C<sub>3</sub> species in genus *Flaveria* (Nakamura et al.,  
105 2013), suggesting that the activity of the PGR5/PGRL1-dependent CEF is also enhanced in C<sub>4</sub> species. Thus,  
106 the PGR5/PGRL1-dependent generation of  $\Delta$ pH is expected to have an equal or greater contribution to  
107 supplying additional ATP required for C<sub>4</sub> photosynthesis than the NDH-dependent CEF.

108 In this study, we generated *PGR5*-, *PGRL1*-, and *NdhO*-knockdown *F. bidentis* lines to clarify the  
109 contribution of the two CEF routes to C<sub>4</sub> photosynthesis. In the *NdhO*-knockdown lines, growth was severely  
110 delayed at medium to high light intensity, and the net CO<sub>2</sub> assimilation rate was reduced to 30% compared to  
111 the WT plants. On the other hand, in the *PGR5*- or *PGRL1*-knockdown lines, growth was normal, but the net  
112 CO<sub>2</sub> assimilation rate was reduced to 80% of the WT plants at high light intensity. From the comparative  
113 analysis of these lines, we concluded that the NDH-dependent CEF contributes as the major route for C<sub>4</sub>  
114 photosynthesis, and the PGR5/PGRL1-dependent CEF also partly contributes to C<sub>4</sub> photosynthesis under high

115 light, but the physiological importance of this route is more inclined to the NPQ induction in *F. bidentis*.

116

## 117 **Results**

118 We knocked down *PGR5*, *PGRL1*, and *NdhO* in *F. bidentis* via RNA interference (RNAi). The target  
119 transcript levels in the transgenic plants, in which *PGR5*, *PGRL1*, or *NdhO* were knocked down (*PGR5*-RNAi,  
120 *PGRL1*-RNAi, and *NdhO*-RNAi, respectively), were approximately 10% of the WT levels (Fig. 1A). The  
121 expression of all three *PGR5* genes identified in the *Flaveria* genome (*PGR5A*, *PGR5B*, and *PGR5C*;  
122 Taniguchi et al., 2021) was suppressed in the *PGR5*-RNAi lines. The protein levels of PGR5, PGRL1, and  
123 NdhH were undetectable or less than 6% of the WT levels in the *PGR5*-RNAi, *PGRL1*-RNAi, and *NdhO*-  
124 RNAi lines, respectively (Fig. 1B). Moreover, PGR5 was undetectable in the *PGRL1*-RNAi lines, likely  
125 because PGR5 is anchored to the thylakoid membrane by PGRL1 (Hertle et al., 2013). The PGRL1 content in  
126 the *PGR5*-RNAi plants was less than 30% of the WT level (Fig. 1, B and C; Supplemental Fig. S1). This may  
127 be due to reduced transcription of *PGRL1* (Fig. 1A) and the impaired stability of the PGR5/PGRL1  
128 heterodimer, which has not been observed in the *A. thaliana pgr5* mutant (Hertle et al., 2013). In *PGR5*- and  
129 *PGRL1*-RNAi plants, the amounts of NdhH and Rieske, a subunit of cytochrome *b<sub>6</sub>f* complex, were similar to  
130 the corresponding amounts in WT plants. In *NdhO*-RNAi plants, the amounts of PGR5 and PsaD, a subunit of  
131 PS I, were similar to those in WT plants, while amounts of PGRL1, PsbO, a subunit of PS II, and Reiske  
132 tended to decrease, although the decrease was not statistically significant, compared to vector control when  
133 the amounts of WT plants were used as the standard (Fig. 1, B and C; Supplemental Fig. S1).

134 To assess CEF activities in the RNAi lines, we monitored the ferredoxin-dependent transfer of  
135 electrons to PQ, which was reflected by an increase in chlorophyll fluorescence following the addition of  
136 NADPH and ferredoxin to ruptured chloroplasts (Fig. 2). Ruptured chloroplasts from homogenized leaves  
137 contained both BSC and MC chloroplasts, as judged by the presence of PEPCs localized in MCs and RbcL, a  
138 large subunit of RuBisCO, localized in BSCs in the homogenized leaf supernatant (Supplemental Fig. S2). PQ  
139 reduction level was estimated with time-dependent chlorophyll fluorescence level (Ft), normalized as (Ft-  
140 Fo)/(Fm-Fo), in which Fo was chlorophyll fluorescence level before the addition of NADPH and ferredoxin,  
141 where Q<sub>A</sub> was oxidized, and Fm was that gained by illumination with saturating pulse, where Q<sub>A</sub> was fully  
142 reduced. The increase in chlorophyll fluorescence level after the addition of ferredoxin was delayed in the  
143 RNAi lines compared with the WT plants (Fig. 2), suggesting the suppression of ferredoxin-dependent  
144 electron transfer to PQ via CEF in ruptured chloroplasts of the RNAi lines. The application of antimycin A,  
145 which inhibits the PGR5/PGRL1-dependent route (Munekage et al., 2002), delayed the increase in chlorophyll  
146 fluorescence in WT plants. Ferredoxin-dependent PQ reduction was not delayed by antimycin A in *PGR5*-  
147 RNAi and *PGRL1*-RNAi plants, whereas it was considerably delayed in *NdhO*-RNAi plants. This indicates  
148 that there are two independent cyclic routes in *F. bidentis*; antimycin A sensitive route was suppressed in  
149 *PGR5*- and *PGRL1*-RNAi plants, and antimycin A insensitive route was suppressed in *NdhO*-RNAi plants.  
150 The final level of chlorophyll fluorescence was elevated in the presence of antimycin A in WT, *PGR5*-RNAi,  
151 and *PGRL1*-RNAi plants. This could be a secondary effect of antimycin A, which may inhibit electron  
152 transport downstream of PQ.

153 The ferredoxin-dependent PQ reduction level in ruptured chloroplasts was lower in CEF-suppressed  
154 plants than in WT plants, whereas the maximum quantum yield of PSII (Fv/Fm) and the effective quantum  
155 yield of PSII ( $\Phi_{\text{PSII}}$ ) in the ruptured chloroplasts treated with methyl viologen, an electron acceptor of PSI, of  
156 the *PGR5*-RNAi and *PGRL1*-RNAi plants were similar to the corresponding values in WT plants (Table 1).  
157 These findings suggest that LEF activities were not impaired in the ruptured chloroplasts of *PGR5*-RNAi and  
158 *PGRL1*-RNAi plants. However, Fv/Fm and  $\Phi_{\text{PSII}}$  in the ruptured chloroplasts were lower in *NdhO*-RNAi  
159 plants than in WT plants, suggesting that the LEF activity was impaired in *NdhO*-RNAi plants.

160 The *NdhO*-RNAi plants were smaller than the WT plants grown under 250  $\mu\text{mol photons m}^{-2} \text{s}^{-1}$   
161 illumination for 45 days (Fig. 3A). The leaf area of *NdhO*-RNAi lines decreased to 3–7% of that of WT plants  
162 (Fig. 3B). Furthermore, *NdhO*-RNAi plants took twice as long as WT plants to flower (Fig. 3C), although the  
163 *NdhO*-RNAi and WT plants both set the first flower bud at the 12<sup>th</sup> node. Even under 1,000  $\mu\text{mol photons m}^{-2}$   
164  $\text{s}^{-1}$ , the *NdhO*-RNAi plants were smaller than the WT plants and the leaf area was decreased to 10–14%  
165 compared to that of the WT plants (Supplemental Fig. S3). These observations indicate drastically slow  
166 growth of the *NdhO*-RNAi plants in comparison with the WT plants. In contrast, the growth of *PGR5*-RNAi  
167 and *PGRL1*-RNAi plants was similar to that of WT plants under 250  $\mu\text{mol photons m}^{-2} \text{s}^{-1}$  and 1,000  $\mu\text{mol}$   
168  $\text{photons m}^{-2} \text{s}^{-1}$  (Fig. 3 and Supplemental Fig. S3). Thus, the NDH-dependent CEF route, but not the  
169 *PGR5*/*PGRL1*-dependent route, is crucial for normal plant growth under both medium and high light  
170 conditions.

171 The net  $\text{CO}_2$  assimilation rate of *NdhO*-RNAi #1 and #18 decreased to 28% and 46% of that of WT  
172 plants, respectively, at 2,000  $\mu\text{mol photons m}^{-2} \text{s}^{-1}$  (Fig. 4A). Considering the chlorophyll content per leaf area  
173 in *NdhO*-RNAi #1 and #18 was 55% and 66% of that in WT plants, respectively (Table 2), the net  $\text{CO}_2$   
174 assimilation rate per chlorophyll content in *NdhO*-RNAi #1 and #18 decreased to approximately 50% and  
175 70% of that in WT plants, respectively. Compared with the effects of the knockdown of *NdhO*, the knockdown  
176 of *PGR5* and *PGRL1* had less of an impact on the net  $\text{CO}_2$  assimilation rate. However, the net  $\text{CO}_2$   
177 assimilation rate per leaf area in *PGR5*-RNAi and *PGRL1*-RNAi plants decreased to approximately 80% of  
178 that in WT plants at 2,000  $\mu\text{mol photons m}^{-2} \text{s}^{-1}$  (Student *t*-test,  $P < 0.05$ , Fig. 4A). The chlorophyll content  
179 per leaf area in *PGR5*-RNAi and *PGRL1*-RNAi plants did not decrease compared with the WT plants (Table  
180 2). Therefore, we conclude that the NDH-dependent CEF route substantially contributes to the  $\text{CO}_2$   
181 assimilation in *F. bidentis*, whereas the *PGR5*/*PGRL1*-dependent route makes a small contribution to the  $\text{CO}_2$   
182 assimilation.

183 Decreased net  $\text{CO}_2$  assimilation rate in the transgenic lines (Fig. 4A) may be caused by decreased  
184  $\Delta\text{pH}$  due to the suppressed CEF activity. To confirm the electron transport activity and  $\Delta\text{pH}$ , we measured  
185 chlorophyll fluorescence parameters (Fig. 4, B and C) along with the  $\text{CO}_2$  assimilation rate (Fig. 4A). Notably,  
186 chlorophyll fluorescence detected here was mainly derived from chloroplasts in the first MC layer. In  $\text{C}_4$   
187 plants, the PSII content is low in the BSC (2–23%) compared with that in the MC (Höfer et al., 1992), so the  
188 chlorophyll fluorescence parameters mainly reflect the electron transport in MCs. Thus, the net  $\text{CO}_2$   
189 assimilation rate (Fig. 4A) reflects the results of coordinated photosynthetic activities of MC and BSC, while  
190 chlorophyll fluorescence parameters (Fig. 4, B and C) reflect the photosynthetic activity of only MC. The

191 rETR, which is the chlorophyll fluorescence parameter representing the relative electron transfer rate of LEF,  
192 was calculated as the product of  $\Phi_{\text{PSII}}$  and photosynthetically active radiation. The rETR decreased in parallel  
193 with the net CO<sub>2</sub> assimilation rate in the CEF-suppressed plants (Fig. 4, A and B; Supplemental Fig. S4).  
194 Since  $\Phi_{\text{PSII}}$  in ruptured chloroplasts of *PGR5*-RNAi and *PGRL1*-RNAi plants in the presence of methyl  
195 viologen was similar to that in WT plants (Table 1), indicating that linear electron transport itself is not  
196 affected, the restricted rETR in MC of the leaves of *PGR5*-RNAi and *PGRL1*-RNAi plants (Fig. 4B) is likely  
197 due to the decrease in CO<sub>2</sub> assimilation (Fig. 4A). We estimated  $\Delta\text{pH}$  by the magnitude of NPQ because NPQ  
198 mainly reflects the thermal dissipation triggered by lumen acidification in land plants (Ruban, 2016). While  
199 the NPQ of *PGR5*-RNAi and *PGRL1*-RNAi plants was lower than that of WT plants, it increased in *NdhO*-  
200 RNAi plants (Fig. 4C). We also analyzed the size of proton motive force (*pmf*) in the CEF-suppressed plants  
201 by measuring the rapid decline of the electrochromic pigment absorbance shift (ECS) when the low, medium,  
202 or high light (100, 330, or 1130  $\mu\text{mol m}^{-2} \text{s}^{-1}$ , respectively) is switched off (Fig. 4D; Supplementary Fig. S7).  
203 The ECSt parameter reflects the light–dark difference in the membrane potential formed across the thylakoid  
204 membrane (Cruz et al., 2004). ECS signal is primarily based on carotenoids and chlorophyll *b*, which are  
205 mainly associated with PSII. Since this system detects the change in absorbance of light transmitted through  
206 the leaf, the ECS signal is derived from chloroplasts in both MC and BSC. In *F. bidentis*, however, since  
207 chloroplasts in BSC contain less PSII, the ECS signal is expected to be highly dependent on chloroplasts in  
208 MC. In the WT plants, the ECSt rose with the increase in light intensity (Fig. 4D). The ECSt in *PGRL1*-RNAi  
209 plants was similar to that in WT plants under low light but was lower under medium and high light. In  
210 contrast, the ECSt in *NdhO*-RNAi plants was higher than that of WT plants under low and medium light.  
211 *NdhO*-RNAi plants exhibited both mild and severe phenotypes in the ECS measurements (Fig. 4D, n=6 for  
212 *NdhO*-RNAi #1), leading to a larger standard deviation, possibly because the rate of carbon dioxide fixation  
213 was severely reduced in *NdhO*-RNAi plants (Fig 4A), and this metabolic rate differed among individuals.  
214 Results of ECSt were consistent with those of light intensity-dependent NPQ induction except for the values  
215 for *NdhO*-RNAi plants at high light (Fig. 4C). The decrease in ECSt of the *NdhO*-RNAi plants under high  
216 light could be attributed to photodamage caused by prolonged high light exposure during the measurement.  
217 The *pmf* is more dependent on the  $\Delta\text{pH}$  than the membrane potential at high light intensity (Cruz et al., 2004).  
218 Thus, these results showed that in *F. bidentis*, the *PGR5*/*PGRL1*-dependent CEF route contributes to the  
219 generation of  $\Delta\text{pH}$ , which is required for NPQ induction in MCs, especially under high light condition, while  
220 the NDH-dependent route may be important for the generation of  $\Delta\text{pH}$  in BSC but does not contribute to NPQ  
221 induction in MC. *NdhO*-RNAi plants showed higher NPQ and *pmf* than WT plants at a low and medium light  
222 intensity, possibly due to slower ATP consumption in MC chloroplasts caused by reduced photosynthetic  
223 activity. This could be the result of ATP depletion in BSCs due to the loss of NDH-dependent CEF activity.

224 To investigate whether the CO<sub>2</sub> concentration mechanism is affected in the CEF-suppressed plants,  
225 we measured the intercellular CO<sub>2</sub> concentration-dependency of the net CO<sub>2</sub> assimilation rate (Fig. 5A). The  
226 initial slope of the net CO<sub>2</sub> assimilation rate response curve to intercellular CO<sub>2</sub> concentration ( $\mu\text{mol m}^{-2} \text{s}^{-1}$   
227 ppm<sup>-1</sup>) was significantly lower in *PGR5*- or *PGRL1*-RNAi plants ( $0.11 \pm 0.04$  or  $0.16 \pm 0.07$ , respectively;  
228 Student *t*-test,  $P < 0.05$ ) compared to those in wild-type plants ( $0.27 \pm 0.06$ ), and much lower in *NdhO*-RNAi

229 #1 or #18 ( $0.02 \pm 0.02$  or  $0.07 \pm 0.03$ , respectively; Student *t*-test,  $P < 0.05$ ). These results suggest that the  
230 CO<sub>2</sub> concentration mechanism might be impaired in the CEF-suppressed plants. The maximum net CO<sub>2</sub>  
231 assimilation rate under high CO<sub>2</sub> concentration was decreased to 85% in *PGR5*-RNAi or *PGRL1*-RNAi plants  
232 and 30–50% in *NdhO*-RNAi plants compared to that of WT plants (Fig. 5A). Taking into account the  
233 chlorophyll content per leaf area (Table 2), the initial slope of the CO<sub>2</sub> response curve ( $\mu\text{mol gChl}^{-1} \text{s}^{-1} \text{ppm}^{-1}$ )  
234 was significantly lower in the CEF-suppressed plants ( $0.21 \pm 0.08$ ,  $0.32 \pm 0.14$ ,  $0.09 \pm 0.09$ , and  $0.22 \pm 0.11$  in  
235 *PGR5*-RNAi, *PGRL1*-RNAi, *NdhO*-RNAi #1, and *NdhO*-RNAi #18, respectively; Student *t*-test,  $P < 0.05$ )  
236 than in the WT plants ( $0.58 \pm 0.12$ ), whereas the maximum CO<sub>2</sub> assimilation rate under high CO<sub>2</sub>  
237 concentration was decreased to 80% in *PGR5*-RNAi or *PGRL1*-RNAi plants or 52–75% in *NdhO*-RNAi  
238 plants compared to that in WT plants. Since activities of PEPC and RuBisCO could affect the initial slope and  
239 saturation rate of the CO<sub>2</sub> response curve, respectively (von Caemmerer and Furbank, 1999), we examined the  
240 amount of PEPC and RbcL in the leaves per chlorophyll basis and found that they neither reduced in *NdhO*-  
241 RNAi plants nor in *PGR5*-RNAi or *PGRL1*-RNAi plants compared with that in WT plants (Supplemental Fig.  
242 S5). Thus, the lowered maximum CO<sub>2</sub> assimilation rate and the initial slope of the curve (Fig. 5A) cannot be  
243 explained by PEPC or Rubisco activity, suggesting that CO<sub>2</sub> assimilation rate in these CEF-suppressed lines  
244 was limited by reduced activity of phosphopyruvate (PEP) regeneration or Calvin-Benson cycle. Further, we  
245 found that chloroplasts, gathered centripetally toward the vein in BSCs of WT, *PGR5*-RNAi, and *PGRL1*-  
246 RNAi plants, were scattered in the BSCs of the *NdhO*-RNAi plants (Fig. 5B). Since the centripetal  
247 arrangement of chloroplasts in the BSCs is thought to minimize CO<sub>2</sub> leakage to the MCs, the abnormal  
248 position of chloroplasts in the BSCs in *NdhO*-RNAi plants may cause a defect in the CO<sub>2</sub>-concentration  
249 mechanism (von Caemmerer and Furbank, 2003).

250 We concluded that impaired CEF results in insufficient ATP production, which limits metabolism,  
251 such as PEP regeneration and the Calvin-Benson cycle.

252

## 253 Discussion

254 Based on a comparison of *PGR5*-RNAi, *PGRL1*-RNAi, and *NdhO*-RNAi plants, we proved that the  
255 NDH-dependent CEF contributes majorly and *PGR5*/*PGRL1*-dependent CEF contributes partly to the NADP-  
256 ME subtype C<sub>4</sub> photosynthesis in *F. bidentis*. Although the *PGR5*/*PGRL1*-dependent route plays a major role  
257 in  $\Delta\text{pH}$  formation in C<sub>3</sub> plants (Yamori and Shikanai, 2016), the present study showed that the NDH-  
258 dependent route plays a central role in the NADP-ME subtype C<sub>4</sub> photosynthesis in *F. bidentis*.

259 In C<sub>3</sub> plants, disruption of the NDH-dependent route had little effect on photosynthesis and plant  
260 phenotype, except under stress conditions or in the case of the absence of the *PGR5*/*PGRL1*-dependent route,  
261 as observed in the double knockout plants of *PGR5*/*PGRL1*-dependent and NDH-dependent routes (Endo et  
262 al., 1999; Suorsa et al., 2012; Munekage et al., 2004). The NDH complex forms a supercomplex with PSI, but  
263 it is only 1–4% of the total PSI in *A. thaliana* (Yamori and Shikanai, 2016; Pribil et al., 2014). Few species  
264 have lost the NDH complex, such as *Pinus thunbergii* and *Phalaenopsis aphrodite*, indicating that  
265 ATP/NADPH can be optimized without NDH activity in these species (Yamori and Shikanai, 2016). On the  
266 other hand, NDH complexes are abundant in C<sub>4</sub> species and accumulate in a cell-selective manner consistent



267 with the demand for ATP/NADPH, while PGR5 and PGRL1 are equally distributed in MC and BSC  
268 (Takabayashi et al., 2005; Nakamura et al., 2013). In the genus *Flaveria*, a subunit of NDH was ten times  
269 more abundant in C<sub>4</sub> species than in C<sub>3</sub> species (Nakamura et al., 2013). Furthermore, the NdhH amount and  
270 NDH activity were increased in C<sub>3</sub>-C<sub>4</sub> intermediate *Flaveria ramosissima* and C<sub>4</sub>-like *Flaveria brownii*, but  
271 the amounts of PGR5 and PGRL1 were not increased (Nakamura et al., 2013; Munekage and Taniguchi,  
272 2016). These evidences suggested that the NDH-dependent route was primarily used to satisfy the  
273 ATP/NADPH demand, which increased along with the development of the C<sub>4</sub> cycle-dependent CO<sub>2</sub>  
274 concentration system during C<sub>4</sub> evolution. We showed here that impairment of the NDH-dependent route  
275 alone resulted in significant growth reduction and decreased photosynthesis in *F. bidentis* (Fig. 3, 4A).  
276 Furthermore, we found abnormal chloroplast position in the BSC of the *NdhO*-RNAi plants (Fig. 5B). In C<sub>4</sub>  
277 species that do not have a thick cell wall or a suberin layer between the BSC and MC, chloroplasts are often  
278 located at the centripetal position of the BSC (Edwards, 2011). These chloroplasts are distanced from the cell  
279 surface on the MC side by vacuoles, suggested to minimize CO<sub>2</sub> leakage from the BSC to the MC (von  
280 Caemmerer and Furbank, 2003). Thus, in *NdhO*-RNAi plants, the abnormal chloroplast position may impair  
281 the CO<sub>2</sub> concentrating mechanism, as reflected in the low initial slope of the net CO<sub>2</sub> assimilation rate  
282 response curve to intercellular CO<sub>2</sub> concentration (Fig. 5A).

283 Previously, Ishikawa et al. (2016) reported that in *NdhN*-knocked-down *F. bidentis* grown at 400  
284  $\mu\text{mol photons m}^{-2} \text{s}^{-1}$ , net CO<sub>2</sub> assimilation rates were slightly lower than wild-type plants at light intensities  
285 below 1000  $\mu\text{mol photons m}^{-2} \text{s}^{-1}$ , but were not affected at higher light intensities. However, we observed  
286 greater phenotypic differences between *NdhO*-RNAi and WT plants grown both at 250 and 1,000  $\mu\text{mol}$   
287  $\text{photons m}^{-2} \text{s}^{-1}$  and a drastic decrease of the net CO<sub>2</sub> assimilation rate in *NdhO*-RNAi plants under high light  
288 conditions as well as under low light condition (Figs 3 and 4A; Supplemental Fig. S3), suggesting a larger role  
289 of the NDH-dependent CEF in the C<sub>4</sub> photosynthesis of *F. bidentis*. This discrepancy between the report by  
290 Ishikawa et al. (2016) and our results is likely due to the remaining expression and activity of the NDH  
291 complex in the *NdhN*-knocked-down lines. A large contribution of the NDH-dependent CEF to C<sub>4</sub>  
292 photosynthesis was also observed in *Z. mays*; knocking out *NdhN* or *NdhO* decreases the CO<sub>2</sub> assimilation rate  
293 by 50% (Peterson et al., 2016). Although monocot *Z. mays* and eudicot *F. bidentis* are phylogenetically  
294 distant, interestingly, CEF activity via the NDH complex plays an important role in both these species that  
295 have acquired NADP-ME subtype C<sub>4</sub> metabolic pathways.

296 It is unclear why the NDH-dependent route, rather than the PGR5/PGRL1-dependent route, became  
297 the main route used in the NADP-ME subtype of C<sub>4</sub> photosynthesis. One possible explanation is that the NDH  
298 complex itself functions as a proton pump and thus the NDH-dependent route can generate  $\Delta\text{pH}$  more  
299 efficiently than the PGR5/PGRL1-dependent route (Shikanai, 2007). Structural studies have revealed that  
300 cyanobacterial NDH-1MS (NDH-I<sub>3</sub>) has proton channels across the thylakoid membrane and a ferredoxin  
301 binding site (Schuller et al., 2020; Pan et al., 2020). Since CEF through the NDH complex allows proton  
302 translocation across the thylakoid membrane during electron transfer from ferredoxin to PQ in addition to  
303 proton translocation by returning electrons at the cytochrome *b<sub>6</sub>f* complex, it may be suitable for the formation  
304 of  $\Delta\text{pH}$  to drive ATP synthesis under conditions where electron input from PSII is limited, such as in

305 chloroplasts of BSC.

306 We showed here that the PGR5/PGRL1-dependent CEF partly helps to supply extra ATP for C<sub>4</sub>  
307 photosynthesis of *F. bidentis* at a high light intensity, based on the result of reduced net CO<sub>2</sub> assimilation rate  
308 in the *PGR5*-RNAi and *PGRL1*-RNAi plants above a light intensity of 1000 μmol photons m<sup>-2</sup> s<sup>-1</sup> (Fig 4A).  
309 PGR5 and PGRL1 function in the same CEF route in *F. bidentis* as previously shown in *A. thaliana* (Hertle et  
310 al., 2013) because we did not see any phenotypic difference between *PGR5*-RNAi and *PGRL1*-RNAi lines in  
311 growth, photosynthetic activity, and NPQ inductions (Figs 2,3 and 4), and the absence of PGRL1 led to  
312 destabilization of PGR5 and vice versa in C<sub>4</sub> *F. bidentis* (Fig. 1B). The *PGR5*-RNAi and *PGRL1*-RNAi plants  
313 exhibited lower NPQ induction and ECSt than WT plants under high light condition (Fig. 4, C and D),  
314 suggesting that the PGR5/PGRL1-dependent route helps generate the ΔpH in *F. bidentis*. However, the  
315 PGR5/PGRL1-dependent route cannot complement the NDH-dependent route concerning the production of  
316 ATP for C<sub>4</sub> photosynthesis. This may be because its physiological role is different from that of the NDH-  
317 dependent route; the PGR5/PGRL1-dependent CEF may be active and generate ΔpH for NPQ induction at  
318 medium to high light intensity, i.e., under the condition of sufficient or excessive light energy, but are not  
319 active at a low light intensity with deficient light energy. In contrast, the NDH-dependent CEF may function  
320 in ΔpH generation to produce ATP in a broad range of light intensity. This idea was supported by the evidence  
321 that lack of PGR5-dependent CEF did not influence *pmf* generation at low light; however, lack of NDH-  
322 dependent CEF slightly but significantly affected *pmf* generation at all light intensities in *A. thaliana* (Wang et  
323 al., 2015). Moreover, it has been reported that overexpression of PGR5 enhanced an electron sink downstream  
324 of PSI but did not increase *pmf* or CO<sub>2</sub> assimilation rate in *F. bidentis* (Tazoe et al., 2020), suggesting that  
325 PGR5/PGRL1-dependent CEF plays a role in avoiding over-reduction of PSI acceptor side and in  
326 photoprotection of PSI. Therefore, the PGR5/PGRL1-dependent CEF may be important for photosynthetic  
327 regulation rather than ATP synthesis.

328 C<sub>4</sub> photosynthesis operates different parts of the metabolic pathway in MCs and BSCs; thus, it is  
329 necessary to change the balance between LEF and CEF activities according to ATP/NADPH demand for each  
330 cell. In the pure NADP-ME subtype of C<sub>4</sub> photosynthesis, in which all oxaloacetate produced by PEP  
331 carboxylation is converted to malate, it has been assumed that ATP is produced only by CEF activity since  
332 NADPH is produced by malate decarboxylation in BSC (Kanai and Edwards, 1999). In *Sorghum bicolor*,  
333 presumed to be a pure NADP-ME subtype species, and *Z. mays*, though reported to possess PEP-CK activity  
334 (Wingler et al., 1999; Furbank, 2011), LEF activity was almost completely downregulated by repression of  
335 PSII subunit expression (Woo et al., 1970; Andersen et al., 1972). In C<sub>4</sub> *Flaveria* species, because 35–40% of  
336 oxaloacetate is converted to aspartate in MC (Moore and Edwards, 1986), which is exported to the BSC where  
337 it is converted back to oxaloacetate and reduced to malate by using NADPH, the remaining activity of PSII  
338 and LEF (around 20% of MC) in BSC is suggested to produce NADPH for reduction of oxaloacetate (Höfer et  
339 al., 1992; Meister et al., 1996). Furthermore, some of the 3-phosphoglycerate produced by RuBisCO  
340 carboxylation are exported to the MC and converted to triosephosphate, and ATP and NADPH are consumed  
341 in this step, as observed by the high activity of phosphoglyceratekinase and NADP-triosephosphate  
342 dehydrogenase in both MC and BSC in many C<sub>4</sub> plants, including NADP-ME types (Ku and Edwards, 1975;

343 Kanai and Edwards, 1999). Taking this metabolism into account, if 50% of 3-phosphoglycerate is exported  
344 and converted to triosephosphate in MC, estimated ATP/NADPH demand is much higher in BSC  
345 (ATP/NADPH = 5) than in MC (ATP/NADPH = 1.9) in *C<sub>4</sub> Flaveria* (Munekage and Taniguchi, 2016).  
346 Leakage of CO<sub>2</sub> from BSC to MC also should be considered for evaluating energy costs. Assuming that 20%  
347 of the concentrated CO<sub>2</sub> leaked from BSC to MC (Henderson et al., 1992), the ATP/NADPH demand would  
348 increase to 2 in MC and 8 in BSC in *C<sub>4</sub> Flaveria*. Since NDH subunits are three times more abundant in BSCs  
349 than in MCs in *F. bidentis* (Nakamura et al., 2013) and ATP demand is very high in BSC, we speculate that the  
350 suppression of NDH-dependent CEF activity limits metabolism, especially in BSCs. On the other hand,  
351 suppression of NDH-dependent CEF activity did not impair ΔpH generation in MCs, considering that NPQ  
352 and ECSt were not lowered in *NdhO*-RNAi plants compared with those in WT plants (Fig. 4, C and D). Taken  
353 together, suppression of NDH-dependent CEF activity may limit Calvin-Benson cycle activity in BSCs and  
354 simultaneously affect coordinated metabolism, including the C<sub>4</sub> cycle and part of the Calvin-Benson cycle (the  
355 conversion step of 3-phosphoglycerate to triosephosphate) taking place in MCs, thereby decreasing ATP  
356 consumption in chloroplasts of MCs. Thus, the high NPQ and ECSt in the MCs of *NdhO*-RNAi plants may be  
357 attributed to excess ΔpH resulting from reduced ATP consumption and residual PGR5/PGRL1-dependent CEF  
358 activity.

359 In conclusion, the NDH-dependent route contributes to the C<sub>4</sub> photosynthesis as a major route of  
360 CEF to provide ATP in the chloroplast. The PGR5/PGRL1-dependent route also partly contributes to C<sub>4</sub>  
361 photosynthesis and is vital for NPQ induction at high light in *F. bidentis*.

362

## 363 **Materials and Methods**

### 364 *Plant materials and growth conditions*

365 *Flaveria bidentis* plants were grown in pots filled with soil and vermiculite (3:2) in a growth  
366 chamber set at 24 °C with a 12-h light/12-h dark photoperiod (250 μmol photons m<sup>-2</sup> s<sup>-1</sup>). The WT, vector  
367 control, *PGR5*-RNAi, and *PGRL1*-RNAi plants were grown for 8–10 weeks, whereas the *NdhO*-RNAi plants  
368 were grown for 12–16 weeks. The fourth-seventh mature leaves were used in the subsequent experiments.

### 369 *RNAi construct preparation and transformation of Flaveria bidentis*

370 The *PGR5*, *PGRL1*, and *NdhO* target sequences (Supplemental Table S1) were amplified from  
371 cDNA derived from the WT *F. bidentis* and inserted into the pART7 vector in sense and antisense orientations  
372 to generate hairpin RNA sequences under the control of the cauliflower mosaic virus (CaMV) 35S promoter.  
373 These cassettes containing the CaMV 35S promoter and the *ocs* terminator were subcloned into the pART27  
374 binary vector at the *NotI* restriction enzyme site (Supplemental Fig. S6). The resulting RNAi vectors were  
375 introduced into *F. bidentis* via *Agrobacterium tumefaciens* strain AGL1 (Chitty et al., 1994). Transformants  
376 were selected based on kanamycin resistance.

### 377 *Quantitative real-time PCR*

378 Total RNA was extracted from leaves with the RNAs-ici!-P kit (RIZO Inc., Tsukuba, Japan). The  
379 extracted total RNA was then treated with the RNase-Free DNase Set (Qiagen, Venlo, the Netherlands) on a  
380 column, purified with the NucleoSpin RNA Clean-up XS (Macherey-Nagel GmbH & Co. KG, Düren,

381 Germany) and then used as the template for reverse transcription with the ReverTra Ace qPCR RT kit  
382 (Toyobo, Osaka, Japan). Quantitative real-time PCR assays were completed with the SYBR Green Master  
383 Mix (Thermo Fisher Scientific, Waltham, USA) and the LightCycler 96 system (Roche, Basel, Switzerland).  
384 Details regarding the quantitative real-time PCR primers are provided in Supplemental Table S2. The target  
385 transcript levels were quantified relative to the expression level of actin7 (*ACT7*), which was used as the  
386 reference gene.

### 387 ***Immunoblot analysis***

388 Leaf samples were crushed in liquid nitrogen, and the resultant powder was suspended in an  
389 extraction buffer comprised of 50 mM Tris-HCl (pH 8.0) and 1% Protease Inhibitor Cocktail (Sigma-Aldrich),  
390 followed by centrifugation at  $20,400 \times g$  for 10 min at 4 °C. The supernatant was used as the soluble protein  
391 sample. The pellet was resuspended in the extraction buffer containing 2% SDS, followed by incubation at 37  
392 °C for 20 min. After centrifugation at 15,000 rpm for 10 min at room temperature, the supernatant was used as  
393 the membrane protein sample. For total protein extraction, leaf powder was suspended in an extraction buffer  
394 containing 2% SDS and centrifuged at 15,000 rpm for 10 min at 20 °C. Protein samples were mixed with 4x  
395 Laemmli Sample Buffer (Bio-Rad) containing 10% 2-mercaptoethanol, denatured at 95 °C for 5 min, and  
396 separated by 12% or 15% sodium dodecyl sulfate-polyacrylamide gel electrophoresis. The separated proteins  
397 were transferred to polyvinylidene difluoride membranes (Immobilon-P; Merck Millipore, Burlington, MA,  
398 USA) and analyzed with the following antibodies: anti-NdhH antibodies (provided by Gilles Peltier), anti-  
399 PGR5 antibodies (Munekage et al., 2002), anti-PGRL1 antibodies (raised from recombinant proteins provided  
400 by Toru Hisabori), anti-Rieske antibodies (Sanda et al., 2011), anti-PsbO antibodies (provided by the late  
401 Akira Watanabe), anti-PsaD antibodies (purchased from Agrisera, Vännäs, Sweden), anti-PEPC antibodies  
402 (provided by Tsuyoshi Furumoto), and anti-RbcL antibodies (provided by Hiroki Ashida). Immunocomplexes  
403 were detected with the Pierce ECL Plus Western Blotting Substrate (Thermo Fisher Scientific).  
404 Chemifluorescent signals were detected with the ImageQuant LAS-4000 mini Lumino image analyzer  
405 (Fujifilm, Tokyo, Japan).

### 406 ***Isolation of ruptured chloroplasts***

407 Leaves were homogenized at high speed (5,000–10,000 rpm) using a Polytron homogenizer PT10-  
408 35GT (Kinematica AG, Switzerland) to grind MCs and BSCs in a medium comprising 330 mM sorbitol, 50  
409 mM Tricine-KOH (pH 8.4), 5 mM MgCl<sub>2</sub>, 10 mM NaCl, and 2 mM ascorbate. The solution was centrifuged at  
410  $3,000 \times g$  for 2 min at 4 °C. The supernatant was used to evaluate the content of RbcL and PEPC. The pellet  
411 was suspended in a medium consisting of 330 mM sorbitol, 20 mM HEPES-NaOH (pH 7.6), 5 mM MgCl<sub>2</sub>,  
412 and 2.5 mM EDTA and then centrifuged at  $3,000 \times g$  for 2 min at 4 °C. The pellet, which contained the  
413 thylakoid membrane, was suspended in a specific medium, as described by Munekage et al. (2002). The  
414 suspension was adjusted to a concentration of 20 µg chlorophyll ml<sup>-1</sup> prior to measuring chlorophyll  
415 fluorescence.

### 416 ***Chlorophyll fluorescence measurement***

417 Chlorophyll fluorescence was measured with the MINI-PAM pulse-amplitude fluorometer (Walz,  
418 Effeltrich, Germany) equipped with a light-emitting diode (emission maximum at 650 nm) as the measuring

419 light source and a halogen lamp (filtered to provide a wavelength < 710 nm) as the actinic light and a  
420 saturating pulse source. The ferredoxin-dependent reduction of PQ in ruptured chloroplasts was measured  
421 under illumination provided by a weak measuring light ( $0.25 \mu\text{mol photons m}^{-2} \text{s}^{-1}$ ) as described previously  
422 (Endo et al., 1998). NADPH (250  $\mu\text{M}$ ) and spinach ferredoxin (5  $\mu\text{M}$ ) were used as electron donors. In this  
423 assay, electrons are transferred from NADPH to ferredoxin by reverse reaction of ferredoxin-NADP<sup>+</sup>  
424 oxidoreductase and further transferred to PQ by NDH-complex or PGR5/PGRL1-dependent cyclic activity  
425 (Munekage et al., 2004; DalCorso et al., 2008). Time-dependent chlorophyll fluorescence level (Ft) was  
426 normalized by setting the minimal fluorescence (F<sub>o</sub>) before electron donor addition and the maximal  
427 fluorescence (F<sub>m</sub>) during saturating pulse irradiation to 0 and 1, respectively. The *in vitro* assay of the linear  
428 electron transport activity was completed in the presence of an electron acceptor (25  $\mu\text{M}$  methyl viologen) as  
429 described by Munekage et al. (2002). Moreover, F<sub>o</sub> (minimal fluorescence in darkness), F<sub>m</sub> (maximal  
430 fluorescence in darkness), F<sub>s</sub> (minimal fluorescence under illumination provided by actinic light), and F<sub>m</sub>'  
431 (maximal fluorescence under illumination provided by actinic light) were measured for the subsequent  
432 calculation of  $F_v/F_m = (F_m - F_o)/F_m$  (Kitajima and Butler, 1975) and  $\Phi_{\text{PSII}} = (F_m' - F_s)/F_m'$  (Genty et al.,  
433 1989).

#### 434 ***Simultaneous measurements of CO<sub>2</sub> exchange and chlorophyll fluorescence***

435 The leaf CO<sub>2</sub> assimilation rate was measured with the LI-6400XT gas analyzer equipped with the  
436 6400-40 Leaf Chamber Fluorometer (LI-COR, Lincoln, NE, USA), as described by Munekage et al. (2008).  
437 The CO<sub>2</sub> gas exchange occurred at 25 °C and 50% relative humidity. 90% red LEDs peaking at 635 nm and  
438 10% blue LEDs peaking at 470 nm were used for actinic light. Plants were not dark-adapted and were  
439 immediately transferred from the growth chamber to the gas analyzer for measurement. To measure the  
440 response to light intensity, we performed the experiments under low to high light intensity. For measurements  
441 of response to intercellular CO<sub>2</sub> concentration, experiments began with an ambient CO<sub>2</sub> concentration of 400  
442 ppm followed by an increase or decrease in CO<sub>2</sub> concentration. The initial slope of the intercellular CO<sub>2</sub>  
443 concentration-response curve was calculated from the slope of the regression line of the three data points at  
444 ambient CO<sub>2</sub> concentrations below 100 ppm. Additionally, chlorophyll fluorescence was simultaneously  
445 measured, with rETR and NPQ calculated as follows:  $r\text{ETR} = \Phi_{\text{PSII}} \times \text{PAR}$  (photosynthetically active  
446 radiation) and  $\text{NPQ} = (F_m - F_m')/F_m'$  (Bilger and Björkman, 1990), where rETR does not account for  
447 changes in leaf absorbance or partitioning of light between photosystems. Dark-acclimation for 15 min was  
448 performed for measurements of dark-acclimated state but not for those of light-acclimated state.

#### 449 ***Spectroscopic measurement of the electrochromic shift***

450 The ECS signal was monitored based on the changes in absorbance at 515 nm detected with the  
451 Dual-PAM 100 measuring system equipped with a P515/535 module (Walz) as described by Nishikawa et al.  
452 (2012). The ECSt was monitored according to the amplitude of the decline in the ECS signal after turning off  
453 the actinic light source (100, 330, or 1130  $\mu\text{mol photons m}^{-2} \text{s}^{-1}$  for 4 min, respectively). A representative  
454 trace of the ECS signal after turning off the actinic light is presented in Supplemental Fig. S7. The ECSt level  
455 was normalized based on the changes in absorbance at 515 nm induced by a single turnover saturating flash.

456 ***Estimation of the chlorophyll content per leaf area***

457 Chlorophyll was extracted from a crushed leaf disc with 80% aqueous acetone. The absorbance of  
458 the chlorophyll extract in a 10-mm cuvette was measured with the NanoDrop 2000c spectrophotometer  
459 (Thermo Fisher Scientific). The chlorophyll concentration of the extracts in 80% acetone was determined, as  
460 described by Porra et al. (1989).

461 ***Staining of leaves with toluidine blue***

462 Leaves were fixed in a buffer comprising 2% paraformaldehyde, 50% ethanol, 1 mM CaCl<sub>2</sub>, and 50  
463 mM PIPES-NaOH (pH 7.2). The sample was embedded in Paraplast X-TRA (melting point of 50–54 °C;  
464 Sigma-Aldrich, USA), after which 6-µm sections were prepared with a microtome. The sections were stained  
465 with 0.02% toluidine blue for 3 min.

466 ***Accession numbers***

467 The *PGR5A*, *PGR5B*, and *PGR5C* cDNA sequences were submitted to the DDBJ (LC493040,  
468 LC493041, and LC493042, respectively).

469

470 **Acknowledgments**

471 This work was supported by Next Generation World-Leading Research (Grant No. GS019) and JSPS  
472 KAKENHI (Grant No. 16H06557). We thank Kaoru Morikawa, Risa Kishizaki and Kikuko Sumiya for  
473 technical assistance.

474

475 **Author contributions**

476 Y. N. M. designed the study; T. O., K. K., N. N. and Y. Y. T. performed the experiments; T. S. helped  
477 with ECS measurement; A. Y. participated in helpful discussions; T. O. and Y. N. M. wrote the manuscript.

478

479 **Funding information**

480 This work was supported by Next Generation World-Leading Research (Grant No. GS019) and JSPS  
481 KAKENHI (Grant No. 16H06557).

482

483 **Supplemental Data**

484 **Supplemental Figure S1.** Immunoblot images used to quantify the relative content of membrane  
485 proteins. Quantitative values shown in Figure 1C were calculated from the chemiluminescence signal  
486 intensities of these samples and the samples shown in Figure 1B. Lanes were loaded with 20 µg protein to  
487 detect PGR5 and 10 µg to detect PGRL1, NdhH, Rieske, PsaD, and PsbO.

488

489 **Supplemental Figure S2.** Evaluation of the relative content of MC- and BSC-specific proteins in  
490 thylakoid extracts used to measure CEF activity. The amounts of PEPC localized to MCs and RbcL  
491 localized to BSCs, in soluble proteins of thylakoid extracts from wild-type and each transgenic line were  
492 compared to those in soluble proteins of wild-type leaves. Lanes were loaded with 5  $\mu\text{g}$  protein for immune  
493 detection of PEPC and RbcL, and for Coomassie blue staining.

494

495 **Supplemental Figure S3.** Growth of the wild-type (WT), vector control (VC), *PGR5*-RNAi #3, *PGRL1*-  
496 RNAi #4, and *NdhO*-RNAi #1, #7, and #18 plants under 1,000  $\mu\text{mol photons m}^{-2} \text{s}^{-1}$  illumination for 35  
497 days. (A) Observable phenotypes of plants. The bar indicates 5 cm. (B) Leaf area per plant. Vertical bars  
498 indicate the SD ( $n = 5$ ). Asterisks indicate significant differences (Student *t*-test,  $P < 0.05$ ) between WT and  
499 *PGR5*-RNAi, *PGRL1*-RNAi, or *NdhO*-RNAi lines.

500

501 **Supplemental Figure S4.** Relationship between the net  $\text{CO}_2$  assimilation rate and rETR measured at  
502 2,000  $\mu\text{mol photons m}^{-2} \text{s}^{-1}$  (see also Fig. 4, A and C). Black closed circle, WT; black open circle, vector  
503 control; light blue square, *PGR5*-RNAi #3; blue diamond, *PGRL1*-RNAi #4; red triangle, *NdhO*-RNAi #1;  
504 pink inverted triangle, *NdhO*-RNAi #18. Vertical and parallel bars indicate the SD ( $n = 3-6$ ).

505

506 **Supplemental Figure S5.** The amounts of PEPC and RbcL in wild-type, vector control, *PGR5*-RNAi #3,  
507 *PGRL1*-RNAi #4, and *NdhO*-RNAi #1, #7, and #18 plants. (A) Immunoblot analysis of PEPC and RbcL and  
508 Coomassie blue staining of loaded proteins performed on samples extracted from three different plants. Lanes  
509 were loaded with 0.2  $\mu\text{g}$  chlorophyll for immune detection of PEPC and RbcL, or 0.5  $\mu\text{g}$  chlorophyll for  
510 Coomassie blue staining. (B) Relative content of PEPC or RbcL quantified by chemiluminescence signal  
511 intensities of immunoblot analysis. The signal intensity of the WT plants was set as 1. Vertical bars indicate  
512 the SD ( $n=3$ ).

513

514 **Supplemental Figure S6.** RNA interference constructs in the pART27 binary vector targeting *FbPGR5*  
515 (A), *FbPGRL1* (B), and *FbNdhO* (C), as well as the vector control (D). CaMV 35S, cauliflower mosaic  
516 virus 35S promoter; PPDK first intron, first intron of the pyruvate phosphate dikinase gene; ocsT, octopine  
517 synthase terminator; nosP, nopaline synthase (nos) promoter; npt II, neomycin phosphotransferase gene;  
518 nosT, nos terminator; RB, the right border of T-DNA; LB, left border of T-DNA.

519

520 **Supplemental Figure S7.** Representative trace of the ECS signal to determine the ECSt parameter. The  
521 ECSt level was determined as the amplitude of the decline in the ECS signal after turning off the actinic  
522 light illuminated for 5 min, and was normalized based on the changes in absorbance at 515 nm induced by a  
523 single turnover saturating flash.

524

525 **Supplemental Table S1.** RNA interference target sequences

526

527 **Supplemental Table S2.** Sequences of primers used for quantitative real-time PCR

528



529 **Tables**

530 **Table 1. Quantum yield of ruptured chloroplasts in the presence of methyl viologen**

|                       | Fv/Fm              | $\Phi_{PSII}$ (260 $\mu\text{mol photons m}^{-2} \text{s}^{-1}$ ) |
|-----------------------|--------------------|-------------------------------------------------------------------|
| Wild-type             | 0.765 $\pm$ 0.012  | 0.302 $\pm$ 0.031                                                 |
| <i>PGR5</i> -RNAi #3  | 0.765 $\pm$ 0.004  | 0.244 $\pm$ 0.034                                                 |
| <i>PGRL1</i> -RNAi #4 | 0.777 $\pm$ 0.003  | 0.322 $\pm$ 0.031                                                 |
| <i>NdhO</i> -RNAi #1  | 0.706 $\pm$ 0.008* | 0.178 $\pm$ 0.016*                                                |

531 Data are presented as the average  $\pm$  SD (n = 3–4). The asterisk indicates a significant difference (Student *t*-  
532 test, *P* < 0.05) between the wild-type plants and the *PGR5*-RNAi, *PGRL1*-RNAi, or *NdhO*-RNAi plants.

533

534 **Table 2. Chlorophyll content per leaf area**

|                       | Chlorophyll <i>a</i> + <i>b</i> ( $\mu\text{g mm}^{-2}$ ) |
|-----------------------|-----------------------------------------------------------|
| Wild-type             | 0.47 $\pm$ 0.03                                           |
| <i>PGR5</i> -RNAi #3  | 0.52 $\pm$ 0.04                                           |
| <i>PGRL1</i> -RNAi #4 | 0.51 $\pm$ 0.02*                                          |
| <i>NdhO</i> -RNAi #1  | 0.26 $\pm$ 0.05*                                          |
| <i>NdhO</i> -RNAi #18 | 0.31 $\pm$ 0.02*                                          |

535 Data are presented as the average  $\pm$  SD (n = 5). The asterisk indicates a significant difference (Student *t*-test, *P*  
536 < 0.05) between the wild-type plants and the *PGR5*-RNAi, *PGRL1*-RNAi, or *NdhO*-RNAi plants.

537

## 538 **References**

- 539 Allen JF (2003) Cyclic, pseudocyclic and noncyclic photophosphorylation: new links in the chain. Trends  
540 Plant Sci 8: 15-19
- 541 Andersen KS, Bain JM, Bishop DG, Smillie RM (1972) Photosystem II activity in agranal bundle sheath  
542 chloroplasts from *Zea mays*. Plant Physiol 49: 461-466
- 543 Bilger W, Björkman O (1990) Role of the xanthophyll cycle in photoprotection elucidated by  
544 measurements of light-induced absorbance changes, fluorescence and photosynthesis in leaves of  
545 *Hedera canariensis*. Photosynth Res 25: 173-185
- 546 Chitty JA, Furbank RT, Marshall JS, Chen Z, Taylor WC (1994) Genetic transformation of the C<sub>4</sub> plant,  
547 *Flaveria bidentis*. Plant J 6: 949-956
- 548 Cruz JA, Avenson TJ, Kanazawa A, Takizawa K, Edwards GE, Kramer DM (2004) Plasticity in light  
549 reactions of photosynthesis for energy production and photoprotection. J Exp Bot 56: 395-406
- 550 DalCorso G, Pesaresi P, Masiero S, Aseeva E, Schünemann D, Finazzi G, Joliot P, Barbato R, Leister D  
551 (2008) A complex containing PGRL1 and PGR5 is involved in the switch between linear and cyclic  
552 electron flow in *Arabidopsis*. Cell 132: 273-285
- 553 Dengler NG, Nelson T (1999) Leaf structure and development in C<sub>4</sub> plants. In RF Sage and RK Monson,  
554 eds, C<sub>4</sub> Plant Biology. Academic Press, USA, pp 133-172
- 555 Endo T, Shikanai T, Sato F, Asada K (1998) NAD(P)H dehydrogenase-dependent, antimycin A- sensitive  
556 electron donation to plastoquinone in tobacco chloroplasts. Plant Cell Physiol 39: 1226-1231
- 557 Endo T, Shikanai T, Takabayashi A, Asada K, Sato F (1999) The role of chloroplastic NAD(P)H  
558 dehydrogenase in photoprotection. FEBS Lett 457: 5-8
- 559 Furbank RT (2011) Evolution of the C<sub>4</sub> photosynthetic mechanism: are there really three C<sub>4</sub> acid  
560 decarboxylation types? J Exp Bot 62: 3103-3108
- 561 Genty B, Briantais J, Baker NR (1989) The relationship between the quantum yield of photosynthetic  
562 electron transport and quenching of chlorophyll fluorescence. Biochim Biophys Acta 990: 87-92
- 563 Hatch MD (1987) C<sub>4</sub> photosynthesis: a unique blend of modified biochemistry, anatomy and  
564 ultrastructure. Biochim Biophys Acta 895: 81-106
- 565 Henderson SA, von Caemmerer S, Farquhar GD (1992) Short-term measurements of carbon isotope  
566 discrimination in several C<sub>4</sub> species. Aust J Plant Physiol 19: 263-285
- 567 Hertle AP, Blunder T, Wunder T, Pesaresi P, Pribil M, Armbruster U, Leister D (2013) PGRL1 is the  
568 elusive ferredoxin-plastoquinone reductase in photosynthetic cyclic electron flow. Mol Cell 49: 511-  
569 523
- 570 Höfer MU, Santore UJ, Westhoff P (1992) Differential accumulation of the 10-, 16- and 23-kDa peripheral  
571 components of the water-splitting complex of photosystem II in mesophyll and bundle-sheath  
572 chloroplasts of the dicotyledonous C<sub>4</sub> plant *Flaveria trinervia* (Spreng.) C. Mohr. Planta 186: 304-312
- 573 Ishikawa N, Takabayashi A, Noguchi K, Tazoe Y, Yamamoto H, von Caemmerer S, Sato F, Endo T (2016)  
574 NDH-mediated cyclic electron flow around photosystem I is crucial for C<sub>4</sub> photosynthesis. Plant Cell  
575 Physiol 57: 2020-2028

- 576 Kanai R, Edwards EE (1999) The biochemistry of C<sub>4</sub> photosynthesis. *In* RF Sage and RK Monson, eds, C<sub>4</sub>  
577 Plant Biology. Academic Press, USA, pp 49-87
- 578 Kitajima M, Butler WL (1975) Quenching of chlorophyll fluorescence and primary photochemistry in  
579 chloroplasts by dibromothymoquinone. *Biochim Biophys Acta* 376: 105-115
- 580 Meister M, Agostino A, Hatch MD (1996) The roles of malate and aspartate in C<sub>4</sub> photosynthetic  
581 metabolism of *Flaveria bidentis* (L.). *Planta* 199: 262-269
- 582 Moore BD, Edwards GE (1986) Photosynthetic induction in a C<sub>4</sub> dicot, *Flaveria trinervia*. I. Initial  
583 products of <sup>14</sup>CO<sub>2</sub> assimilation and levels of whole leaf C<sub>4</sub> metabolites. *Plant Physiol* 81: 663-668
- 584 Munekage Y, Hojo M, Meurer J, Endo T, Tasaka M, Shikanai T (2002) *PGR5* is involved in cyclic  
585 electron flow around photosystem I and is essential for photoprotection in *Arabidopsis*. *Cell* 110: 361-  
586 371
- 587 Munekage Y, Hashimoto M, Miyake C, Tomizawa K, Endo T, Tasaka M, Shikanai T (2004) Cyclic  
588 electron flow around photosystem I is essential for photosynthesis. *Nature* 429: 579-582
- 589 Munekage Y, Genty B, Peltier G (2008) Effect of *PGR5* impairment on photosynthesis and growth in  
590 *Arabidopsis thaliana*. *Plant Cell Physiol* 49: 1688-1698
- 591 Munekage Y, Taniguchi Y (2016) Promotion of cyclic electron transport around photosystem I with the  
592 development of C<sub>4</sub> photosynthesis. *Plant Cell Physiol* 57: 897-903
- 593 Munekage Y (2016) Light harvesting and chloroplast electron transport in NADP-malic enzyme type C<sub>4</sub>  
594 plants. *Curr Opin Plant Biol* 31: 9-15
- 595 Nakamura N, Iwano M, Havaux M, Yokota A, Munekage Y (2013) Promotion of cyclic electron transport  
596 around photosystem I during the evolution of NADP-malic enzyme-type C<sub>4</sub> photosynthesis in the  
597 genus *Flaveria*. *New Phytol* 199: 832-842
- 598 Nishikawa Y, Yamamoto H, Okegawa Y, Wada S, Sato N, Taira Y, Sugimoto K, Makino A, Shikanai T  
599 (2012) *PGR5*-dependent cyclic electron transport around PSI contributes to the redox homeostasis in  
600 chloroplasts rather than CO<sub>2</sub> fixation and biomass production in rice. *Plant Cell Physiol* 53: 2117-2126
- 601 Osmond CB (1981) Photorespiration and photoinhibition: some implications for the energetics of  
602 photosynthesis. *Biochim Biophys Acta* 639: 77-98
- 603 Pan X, Cao D, Xie F, Xu F, Su X, Mi H, Zhang X, Li M (2020) Structural basis for electron transport  
604 mechanism of complex I-like photosynthetic NAD(P)H dehydrogenase. *Nat Commun* 11: 610
- 605 Peltier G, Aro EM, Shikanai T (2016) NDH-1 and NDH-2 plastoquinone reductases in oxygenic  
606 photosynthesis. *Annu Rev Plant Biol* 67: 55-80
- 607 Peterson RB, Schultes NP, McHale NA, Zelitch I (2016) Evidence for a role for NAD(P)H dehydrogenase  
608 in concentration of CO<sub>2</sub> in the bundle sheath cell of *Zea mays*. *Plant Physiol* 171: 125-138
- 609 Porra RJ, Thompson WA, Kriedemann PE (1989) Determination of accurate extinction coefficients and  
610 simultaneous equations for assaying chlorophyll *a* and *b* extracted with four different solvents:  
611 verification of the concentration of chlorophyll standards by atomic absorption spectroscopy. *Biochim*  
612 *Biophys Acta* 975: 384-394
- 613 Pribil M, Labs M, Leister D (2014) Structure and dynamics of thylakoids in land plants. *J Exp Bot*

- 614 65:1955-1972
- 615 Ruban AV (2016) Nonphotochemical chlorophyll fluorescence quenching: mechanism and effectiveness  
616 in protecting plants from photodamage. *Plant Physiol* 170: 1903-1916
- 617 Sage RF, Sage TL, Kocacinar F (2012) Photorespiration and the evolution of C<sub>4</sub> photosynthesis. *Annu*  
618 *Rev Plant Biol* 63: 19-47
- 619 Sanda S, Yoshida K, Kuwano M, Kawamura T, Munekage Y, Akashi K, Yokota A (2011) Response of the  
620 photosynthetic electron transport system to excess light energy caused by water deficient in wild  
621 watermelon. *Physiol Plantarum* 142: 247-264
- 622 Schuller JM, Birrell JA, Tanaka H, Konuma T, Wulfhorst H, Cox N, Schuller SK, Thiemann J, Lubitz W,  
623 Sétif P, Ikegami T, Engel BD, Kurisu G, Nowaczyk MM (2019) Structural adaptations of  
624 photosynthetic complex I enable ferredoxin-dependent electron transfer. *Science* 363: 257-260
- 625 Schuller JM, Saura P, Thiemann J, Schuller SK, Gamiz-Hernandez AP, Kurisu G, Nowaczyk MM, Kaila  
626 VRI (2020) Redox-coupled proton pumping drives carbon concentration in the photosynthetic  
627 complex I. *Nat Commun* 11: 494
- 628 Shikanai T (2007) Cyclic electron transport around photosystem I: genetic approaches. *Annu Rev Plant*  
629 *Biol* 58: 199-217
- 630 Suorsa M, Järvi S, Grieco M, Nurmi M, Pietrzykowska M, Rantala M, Kangasjärvi S, Paakkarinen V,  
631 Tikkanen M, Jansson S, Aro EM (2012) PROTON GRADIENT REGULATION5 is essential for  
632 proper acclimation of *Arabidopsis* photosystem I to naturally and artificially fluctuating light  
633 conditions. *Plant Cell* 24: 2934-2948
- 634 Takabayashi A, Kishine M, Asada K, Endo T, Sato F (2005) Differential use of two cyclic electron flows  
635 around photosystem I for driving CO<sub>2</sub>-concentration mechanism in C<sub>4</sub> photosynthesis. *Proc Natl Acad*  
636 *Sci USA* 102: 16898-16903
- 637 Taniguchi YY, Gowik U, Kinoshita Y, Kishizaki R, Ono N, Yokota A, Westhoff P, Munekage YN (2021)  
638 Dynamic changes of genome sizes and gradual gain of cell-specific distribution of C<sub>4</sub> enzymes during  
639 C<sub>4</sub> evolution in genus *Flaveria*. *Plant Genome*: e20095
- 640 Tazoe Y, Ishikawa N, Shikanai T, Ishiyama K, Takagi D, Makino A, Sato F, Endo T (2020)  
641 Overproduction of PGR5 enhances the electron sink downstream of photosystem I in a C<sub>4</sub> plant,  
642 *Flaveria bidentis*. *Plant J* 103: 814-823
- 643 von Caemmerer S, Furbank RT (1999) Modeling C<sub>4</sub> photosynthesis. In RF Sage and RK Monson, eds, C<sub>4</sub>  
644 *Plant Biology*. Academic Press, USA, pp 173-211
- 645 von Caemmerer S, Furbank RT (2003) The C<sub>4</sub> pathway: an efficient CO<sub>2</sub> pump. *Photosynth Res* 77: 191-  
646 207
- 647 Woo KC, Anderson JM, Boardman NK, Downton WJ, Osmond CB, Thorne SW (1970) Deficient  
648 photosystem II in agranal bundle sheath chloroplasts of C<sub>4</sub> plants. *Proc Natl Acad Sci USA* 67: 18-25
- 649 Yamamoto H, Shikanai T (2013) *In planta* mutagenesis of Src homology 3 domain-like fold of NdhS, a  
650 ferredoxin-binding subunit of the chloroplast NADH dehydrogenase-like complex in *Arabidopsis*. *J*  
651 *Biol Chem* 288: 36328-36337

- 652 Yamori W, Sakata N, Suzuki Y, Shikanai T, Makino A (2011) Cyclic electron flow around photosystem I  
653 via chloroplast NAD(P)H dehydrogenase (NDH) complex performs a significant physiological role  
654 during photosynthesis and plant growth at low temperature in rice. *Plant J* 68: 966-976
- 655 Yamori W, Shikanai T (2016) Physiological function of cyclic electron transport around photosystem I in  
656 sustaining photosynthesis and plant growth. *Annu Rev Plant Biol* 67: 81-106
- 657 Yamori W, Makino A, Shikanai T (2016) A physiological role of cyclic electron transport around  
658 photosystem I in sustaining photosynthesis under fluctuating light in rice. *Sci Rep* 6: 20147
- 659 Wang C, Yamamoto H, Shikanai T (2015) Role of cyclic electron transport around photosystem I in  
660 regulating proton motive force. *Biochim Biophys Acta* 1847: 931-938
- 661 Winkler A, Walker RP, Chen Z-H, Leegood RC (1999) Phosphoenolpyruvate carboxykinase is involved in  
662 the decarboxylation of aspartate in the bundle sheath of maize. *Plant Physiol* 120: 539–545
- 663

## 664 **Figure Legends**

### 665 **Figure 1**

666 Knockdown of *PGR5*, *PGRL1*, and *NdhO* in *F. bidentis*. (A) Expression of *PGR5A*, *PGR5B*,  
667 *PGR5C*, and *PGRL1* in *PGR5*-RNAi lines, *PGRL1* in *PGRL1*-RNAi lines, and *NdhO* in *NdhO*-RNAi lines  
668 relative to the corresponding expression in the WT controls. Vertical bars indicate the SD ( $n = 4-5$ ). Asterisks  
669 indicate significant differences (Student *t*-test,  $P < 0.05$ ) between WT and *PGR5*-RNAi, *PGRL1*-RNAi, or  
670 *NdhO*-RNAi lines. (B) Immunoblot analysis of the membrane proteins extracted from the leaves of the WT,  
671 vector control (VC), *PGR5*-RNAi, *PGRL1*-RNAi, and *NdhO*-RNAi lines. Lanes were loaded with 20  $\mu\text{g}$   
672 protein to detect PGR5 and 10  $\mu\text{g}$  to detect PGRL1, NdhH, Rieske, PsaD and PsbO. The dilution series for the  
673 WT plants are indicated. (C) Relative content of membrane proteins involved in cyclic or linear electron flow.  
674 The amount of membrane proteins was quantified by chemiluminescence signal intensities of immunoblot  
675 analysis, and the signal intensity of the WT plants was set to 1. Vertical bars indicate the SD ( $n=3$ ). Asterisks  
676 indicate significant differences (Student *t*-test,  $P < 0.05$ ) between VC and *PGR5*-RNAi, *PGRL1*-RNAi, or  
677 *NdhO*-RNAi lines.

### 678 **Figure 2**

679 Electron transfer to PQ in ruptured chloroplasts (20  $\mu\text{g}$  chlorophyll  $\text{ml}^{-1}$ ) following the addition of  
680 250  $\mu\text{M}$  NADPH and 5  $\mu\text{M}$  ferredoxin (Fd). The electron transfer was based on the chlorophyll fluorescence  
681 under weak light (0.25  $\mu\text{mol}$  photons  $\text{m}^{-2} \text{s}^{-1}$ ). Data are presented as the average of three measurements. Black  
682 line, no antimycin A; gray line, in the presence of 5  $\mu\text{M}$  antimycin A.

### 683 **Figure 3**

684 Photosynthetic activity assessed based on growth under medium light conditions (250  $\mu\text{mol}$  photons  
685  $\text{m}^{-2} \text{s}^{-1}$ ). (A) Observable phenotypes of 45-day-old plants. The bar indicates 5 cm. (B) Leaf area per plant of  
686 45-day-old plants. (C) Days to flowering. Vertical bars indicate the SD ( $n = 5$ ). Asterisks indicate significant  
687 differences (Student *t*-test,  $P < 0.05$ ) between WT and *PGR5*-RNAi, *PGRL1*-RNAi, or *NdhO*-RNAi lines.

### 688 **Figure 4**

689 Response curve of the net  $\text{CO}_2$  assimilation rate per leaf area (A), rETR (B), NPQ (C), and the ECSt  
690 parameter (D) to light intensity. (A-C) Chlorophyll fluorescence parameters were measured along with the  
691  $\text{CO}_2$  assimilation rate under 400 ppm ambient  $\text{CO}_2$ . (D) The ECSt parameter was estimated by measuring the  
692 rapid decline of the electrochromic pigment absorbance shift after the cessation of actinic light. Black closed  
693 circles, WT; black open circles, vector control; light blue squares, *PGR5*-RNAi #3; blue diamonds, *PGRL1*-  
694 RNAi #4; red triangles, *NdhO*-RNAi #1; pink inverted triangles, *NdhO*-RNAi #18. Vertical bars indicate the  
695 SD (A-C,  $n = 3-6$ ; D,  $n = 4-6$ ). Light blue, blue, red, or pink asterisks indicate significant differences (Student  
696 *t*-test,  $P < 0.05$ ) between WT and *PGR5*-RNAi #3, *PGRL1*-RNAi #4, *NdhO*-RNAi #1 or *NdhO*-RNAi #18,  
697 respectively.

### 698 **Figure 5**

699 Response curve of the net  $\text{CO}_2$  assimilation rate per leaf area to intercellular  $\text{CO}_2$  concentration  
700 under 1,500  $\mu\text{mol} \text{m}^{-2} \text{s}^{-1}$  illumination (A) and location of chloroplasts in the cell (B). (A) Black closed  
701 circles, WT; black open circles, vector control; light blue squares, *PGR5*-RNAi #3; blue diamonds, *PGRL1*-

702 RNAi #4; red triangles, *NdhO*-RNAi #1; pink inverted triangles, *NdhO*-RNAi #18. Vertical bars indicate the  
703 SD (n = 3–7). Light blue, blue, red, or pink asterisks indicate significant differences (Student *t*-test,  $P < 0.05$ )  
704 between WT and *PGR5*-RNAi #3, *PGRL1*-RNAi #4, *NdhO*-RNAi #1 or *NdhO*-RNAi #18, respectively. (B)  
705 Cross section of WT and RNAi plant leaves stained with toluidine blue. Arrows indicate chloroplasts in BSC.  
706 Bars indicate 20  $\mu\text{m}$ .  
707

1 **Figure 1**

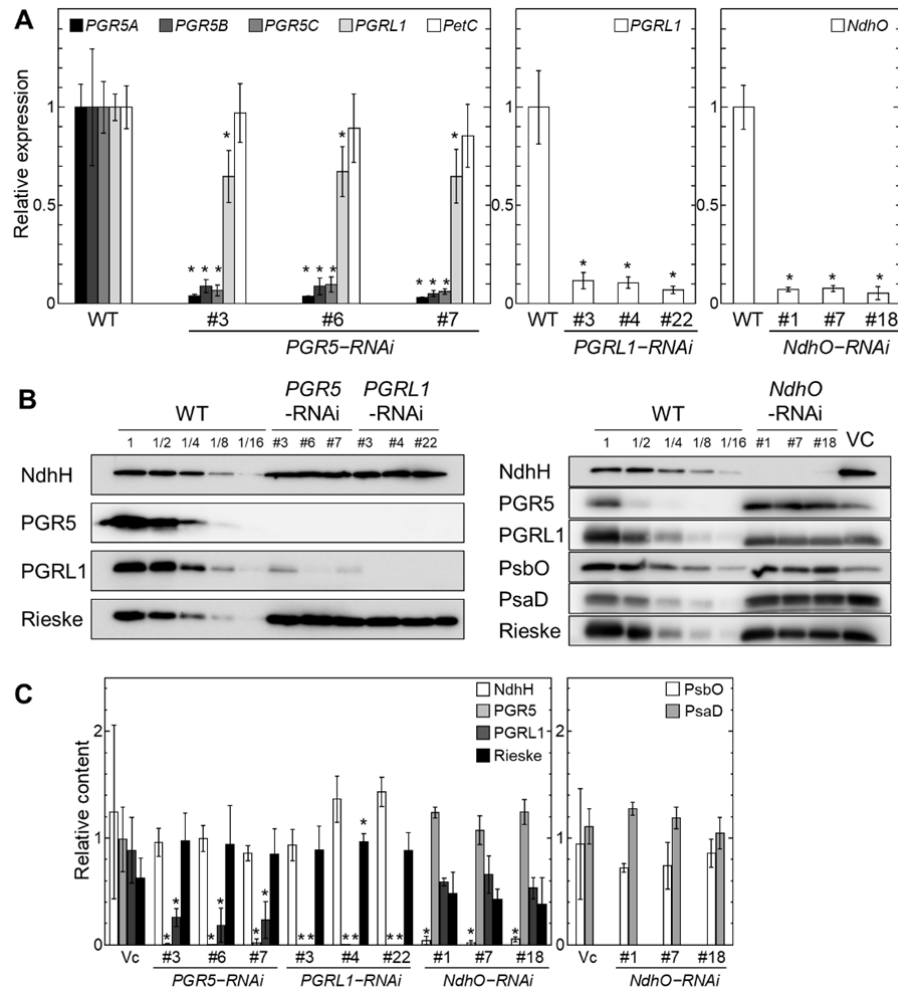

**Figure 1.** Knockdown of *PGR5*, *PGRL1*, and *NdhO* in *F. bidentis*. (A) Expression of *PGR5A*, *PGR5B*, *PGR5C*, and *PGRL1* in *PGR5*-RNAi lines, *PGRL1* in *PGRL1*-RNAi lines, and *NdhO* in *NdhO*-RNAi lines relative to the corresponding expression in the WT controls. Vertical bars indicate the SD (n = 4–5). Asterisks indicate significant differences (Student *t*-test,  $P < 0.05$ ) between WT and *PGR5*-RNAi, *PGRL1*-RNAi, or *NdhO*-RNAi lines. (B) Immunoblot analysis of the membrane proteins extracted from the leaves of the WT, vector control (VC), *PGR5*-RNAi, *PGRL1*-RNAi, and *NdhO*-RNAi lines. Lanes were loaded with 20  $\mu$ g protein to detect PGR5 and 10  $\mu$ g to detect PGRL1, NdhH, Rieske, PsaD and PsbO. The dilution series for the WT plants are indicated. (C) Relative content of membrane proteins involved in cyclic or linear electron flow. The amount of proteins was quantified by chemiluminescence signal intensities of immunoblot analysis, and the signal intensity of the WT plants was set to 1. Vertical bars indicate the SD (n=3). Asterisks indicate significant differences (Student *t*-test,  $P < 0.05$ ) between VC and *PGR5*-RNAi, *PGRL1*-RNAi, or *NdhO*-RNAi lines.



**Figure 2**

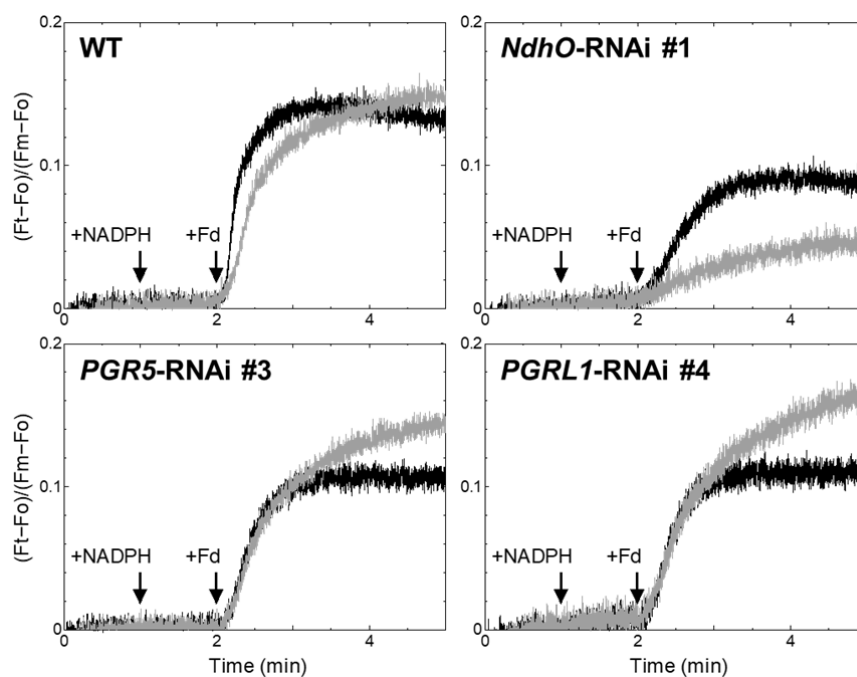

**Figure 2.** Electron transfer to PQ in ruptured chloroplasts ( $20 \mu\text{g}$  chlorophyll  $\text{ml}^{-1}$ ) following the addition of  $250 \mu\text{M}$  NADPH and  $5 \mu\text{M}$  ferredoxin (Fd). The electron transfer was based on the chlorophyll fluorescence under weak light ( $0.25 \mu\text{mol photons m}^{-2} \text{s}^{-1}$ ). Data are presented as the average of three measurements. Black line, no antimycin A; gray line, in the presence of  $5 \mu\text{M}$  antimycin A.

**Figure 3**

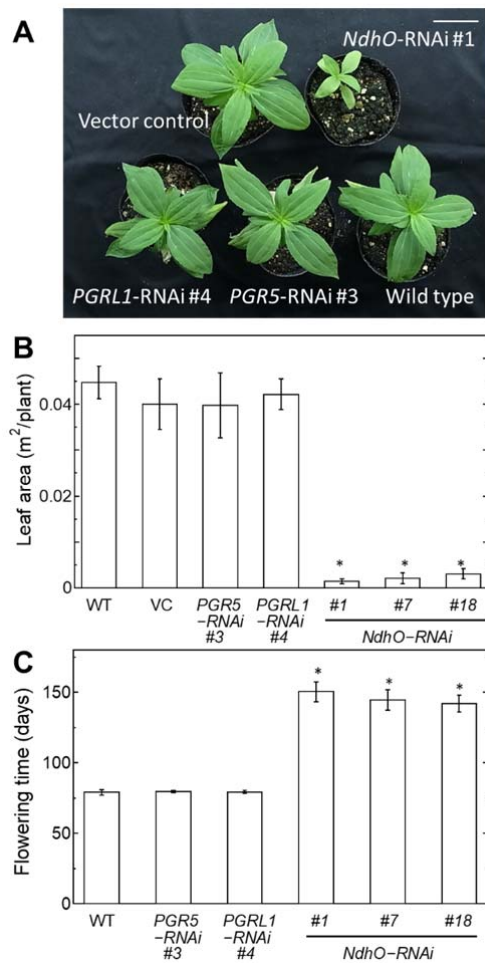

**Figure 3.** Photosynthetic activity assessed based on growth under medium light condition ( $250 \mu\text{mol photons m}^{-2} \text{s}^{-1}$ ). (A) Observable phenotypes of 45-day-old plants. The bar indicates 5 cm. (B) Leaf area per plant of 45-day-old plants. (C) Days to flowering. Vertical bars indicate the SD ( $n = 5$ ). Asterisks indicate significant differences (Student  $t$ -test,  $P < 0.05$ ) between WT and *PGR5*-RNAi, *PGRL1*-RNAi, or *NdhO*-RNAi lines.

**Figure 4**

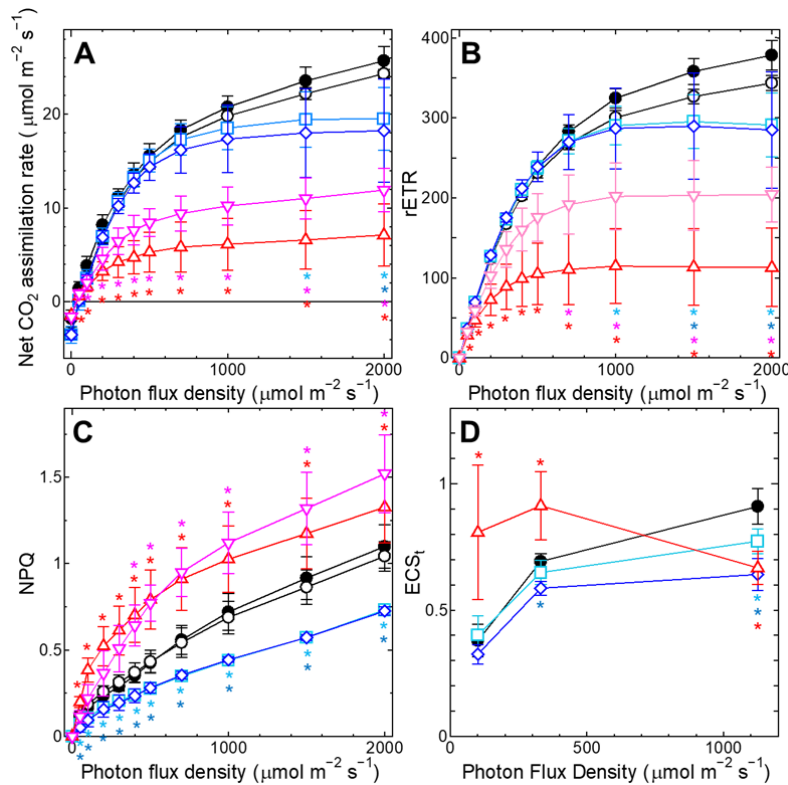

**Figure 4.** Response curve of the net CO<sub>2</sub> assimilation rate per leaf area (A), rETR (B), NPQ (C) and the ECSt parameter (D) to light intensity. (A-C) Chlorophyll fluorescence parameters were measured along with the CO<sub>2</sub> assimilation rate under 400 ppm ambient CO<sub>2</sub>. (D) The ECSt parameter was estimated by measuring the rapid decline of the electrochromic pigment absorbance shift after cessation of actinic light. Black closed circles, WT; black open circles, vector control; light blue squares, *PGR5*-RNAi #3; blue diamonds, *PGRL1*-RNAi #4; red triangles, *NdhO*-RNAi #1; pink inverted triangles, *NdhO*-RNAi #18. Vertical bars indicate the SD (A-C, n = 3–6; D, n = 4–6). Light blue, blue, red or pink asterisks indicate significant differences (Student *t*-test,  $P < 0.05$ ) between WT and *PGR5*-RNAi #3, *PGRL1*-RNAi #4, *NdhO*-RNAi #1 or *NdhO*-RNAi #18, respectively.

1 **Figure 5**

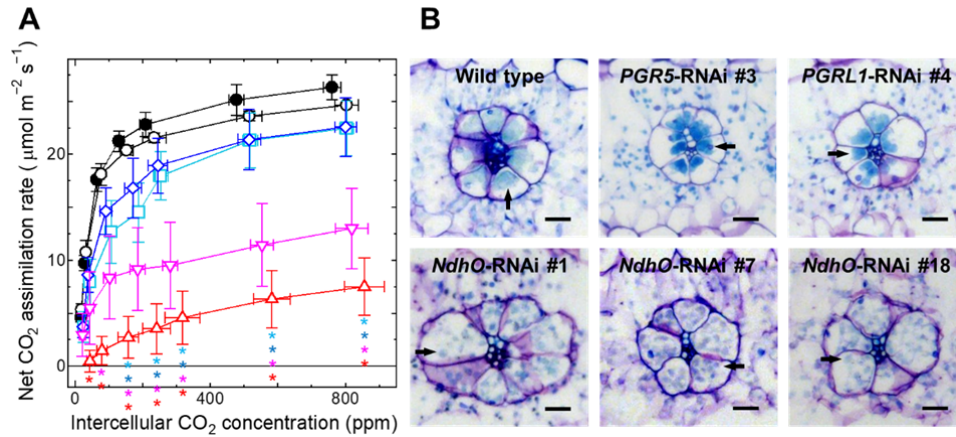

**Figure 5.** Response curve of the net CO<sub>2</sub> assimilation rate per leaf area to intercellular CO<sub>2</sub> concentration under 1,500 μmol m<sup>-2</sup> s<sup>-1</sup> illumination (A) and location of chloroplasts in the cell (B). (A) Black closed circles, WT; black open circles, vector control; light blue squares, *PGR5*-RNAi #3; blue diamonds, *PGR1*-RNAi #4; red triangles, *NdhO*-RNAi #1; pink inverted triangles, *NdhO*-RNAi #18. Vertical bars indicate the SD (n = 3–7). Light blue, blue, red or pink asterisks indicate significant differences (Student *t*-test, *P* < 0.05) between WT and *PGR5*-RNAi #3, *PGR1*-RNAi #4, *NdhO*-RNAi #1 or *NdhO*-RNAi #18, respectively. (B) Cross section of WT and RNAi plant leaves stained with toluidine blue. Arrows indicate chloroplasts in BSC. Bars indicate 20 μm.

2

3

## Parsed Citations

- Allen JF (2003) Cyclic, pseudocyclic and noncyclic photophosphorylation: new links in the chain. Trends Plant Sci 8: 15-19**  
Google Scholar: [Author Only](#) [Title Only](#) [Author and Title](#)
- Andersen KS, Bain JM, Bishop DG, Smillie RM (1972) Photosystem II activity in agranal bundle sheath chloroplasts from Zea mays. Plant Physiol 49: 461-466**  
Google Scholar: [Author Only](#) [Title Only](#) [Author and Title](#)
- Bilger W, Björkman O (1990) Role of the xanthophyll cycle in photoprotection elucidated by measurements of light-induced absorbance changes, fluorescence and photosynthesis in leaves of Hedera canariensis. Photosynth Res 25: 173-185**  
Google Scholar: [Author Only](#) [Title Only](#) [Author and Title](#)
- Chitty JA, Furbank RT, Marshall JS, Chen Z, Taylor WC (1994) Genetic transformation of the C4 plant, Flaveria bidentis. Plant J 6: 949-956**  
Google Scholar: [Author Only](#) [Title Only](#) [Author and Title](#)
- Cruz JA, Avenson TJ, Kanazawa A, Takizawa K, Edwards GE, Kramer DM (2004) Plasticity in light reactions of photosynthesis for energy production and photoprotection. J Exp Bot 56: 395-406**  
Google Scholar: [Author Only](#) [Title Only](#) [Author and Title](#)
- DalCorso G, Pesaresi P, Masiero S, Aseeva E, Schünemann D, Finazzi G, Joliot P, Barbato R, Leister D (2008) A complex containing PGRL1 and PGR5 is involved in the switch between linear and cyclic electron flow in Arabidopsis. Cell 132: 273-285**  
Google Scholar: [Author Only](#) [Title Only](#) [Author and Title](#)
- Dengler NG, Nelson T (1999) Leaf structure and development in C4 plants. In RF Sage and RK Monson, eds, C4 Plant Biology. Academic Press, USA, pp 133-172**  
Google Scholar: [Author Only](#) [Title Only](#) [Author and Title](#)
- Endo T, Shikanai T, Sato F, Asada K (1998) NAD(P)H dehydrogenase-dependent, antimycin A- sensitive electron donation to plastoquinone in tobacco chloroplasts. Plant Cell Physiol 39: 1226-1231**  
Google Scholar: [Author Only](#) [Title Only](#) [Author and Title](#)
- Endo T, Shikanai T, Takabayashi A, Asada K, Sato F (1999) The role of chloroplastic NAD(P)H dehydrogenase in photoprotection. FEBS Lett 457: 5-8**  
Google Scholar: [Author Only](#) [Title Only](#) [Author and Title](#)
- Furbank RT (2011) Evolution of the C4 photosynthetic mechanism: are there really three C4 acid decarboxylation types? J Exp Bot 62: 3103-3108**  
Google Scholar: [Author Only](#) [Title Only](#) [Author and Title](#)
- Genty B, Briantais J, Baker NR (1989) The relationship between the quantum yield of photosynthetic electron transport and quenching of chlorophyll fluorescence. Biochim Biophys Acta 990: 87-92**  
Google Scholar: [Author Only](#) [Title Only](#) [Author and Title](#)
- Hatch MD (1987) C4 photosynthesis: a unique blend of modified biochemistry, anatomy and ultrastructure. Biochim Biophys Acta 895: 81-106**  
Google Scholar: [Author Only](#) [Title Only](#) [Author and Title](#)
- Henderson SA, von Caemmerer S, Farquhar GD (1992) Short-term measurements of carbon isotope discrimination in several C4 species. Aust J Plant Physiol 19: 263-285**  
Google Scholar: [Author Only](#) [Title Only](#) [Author and Title](#)
- Hertle AP, Blunder T, Wunder T, Pesaresi P, Pribil M, Armbruster U, Leister D (2013) PGRL1 is the elusive ferredoxin-plastoquinone reductase in photosynthetic cyclic electron flow. Mol Cell 49: 511-523**  
Google Scholar: [Author Only](#) [Title Only](#) [Author and Title](#)
- Höfer MU, Santore UJ, Westhoff P (1992) Differential accumulation of the 10-, 16- and 23-kDa peripheral components of the water-splitting complex of photosystem II in mesophyll and bundle-sheath chloroplasts of the dicotyledonous C4 plant Flaveria trinervia (Spreng.) C. Mohr. Planta 186: 304-312**  
Google Scholar: [Author Only](#) [Title Only](#) [Author and Title](#)
- Ishikawa N, Takabayashi A, Noguchi K, Tazoe Y, Yamamoto H, von Caemmerer S, Sato F, Endo T (2016) NDH-mediated cyclic electron flow around photosystem I is crucial for C4 photosynthesis. Plant Cell Physiol 57: 2020-2028**  
Google Scholar: [Author Only](#) [Title Only](#) [Author and Title](#)
- Kanai R, Edwards EE (1999) The biochemistry of C4 photosynthesis. In RF Sage and RK Monson, eds, C4 Plant Biology. Academic Press, USA, pp 49-87**  
Google Scholar: [Author Only](#) [Title Only](#) [Author and Title](#)

**Kitajima M, Butler WL (1975) Quenching of chlorophyll fluorescence and primary photochemistry in chloroplasts by dibromothymoquinone. *Biochim Biophys Acta* 376: 105-115**

Google Scholar: [Author Only](#) [Title Only](#) [Author and Title](#)

**Meister M, Agostino A, Hatch MD (1996) The roles of malate and aspartate in C4 photosynthetic metabolism of *Flaveria bidentis* (L.). *Planta* 199: 262-269**

Google Scholar: [Author Only](#) [Title Only](#) [Author and Title](#)

**Moore BD, Edwards GE (1986) Photosynthetic induction in a C4 dicot, *Flaveria trinervia*. I. Initial products of <sup>14</sup>CO<sub>2</sub> assimilation and levels of whole leaf C4 metabolites. *Plant Physiol* 81: 663-668**

Google Scholar: [Author Only](#) [Title Only](#) [Author and Title](#)

**Munekage Y, Hojo M, Meurer J, Endo T, Tasaka M, Shikanai T (2002) PGR5 is involved in cyclic electron flow around photosystem I and is essential for photoprotection in *Arabidopsis*. *Cell* 110: 361-371**

Google Scholar: [Author Only](#) [Title Only](#) [Author and Title](#)

**Munekage Y, Hashimoto M, Miyake C, Tomizawa K, Endo T, Tasaka M, Shikanai T (2004) Cyclic electron flow around photosystem I is essential for photosynthesis. *Nature* 429: 579-582**

Google Scholar: [Author Only](#) [Title Only](#) [Author and Title](#)

**Munekage Y, Genty B, Peltier G (2008) Effect of PGR5 impairment on photosynthesis and growth in *Arabidopsis thaliana*. *Plant Cell Physiol* 49: 1688-1698**

Google Scholar: [Author Only](#) [Title Only](#) [Author and Title](#)

**Munekage Y, Taniguchi Y (2016) Promotion of cyclic electron transport around photosystem I with the development of C4 photosynthesis. *Plant Cell Physiol* 57: 897-903**

Google Scholar: [Author Only](#) [Title Only](#) [Author and Title](#)

**Munekage Y (2016) Light harvesting and chloroplast electron transport in NADP-malic enzyme type C4 plants. *Curr Opin Plant Biol* 31: 9-15**

Google Scholar: [Author Only](#) [Title Only](#) [Author and Title](#)

**Nakamura N, Iwano M, Havaux M, Yokota A, Munekage Y (2013) Promotion of cyclic electron transport around photosystem I during the evolution of NADP-malic enzyme-type C4 photosynthesis in the genus *Flaveria*. *New Phytol* 199: 832-842**

Google Scholar: [Author Only](#) [Title Only](#) [Author and Title](#)

**Nishikawa Y, Yamamoto H, Okegawa Y, Wada S, Sato N, Taira Y, Sugimoto K, Makino A, Shikanai T (2012) PGR5-dependent cyclic electron transport around PSI contributes to the redox homeostasis in chloroplasts rather than CO<sub>2</sub> fixation and biomass production in rice. *Plant Cell Physiol* 53: 2117-2126**

Google Scholar: [Author Only](#) [Title Only](#) [Author and Title](#)

**Osmond CB (1981) Photorespiration and photoinhibition: some implications for the energetics of photosynthesis. *Biochim Biophys Acta* 639: 77-98**

Google Scholar: [Author Only](#) [Title Only](#) [Author and Title](#)

**Pan X, Cao D, Xie F, Xu F, Su X, Mi H, Zhang X, Li M (2020) Structural basis for electron transport mechanism of complex I-like photosynthetic NAD(P)H dehydrogenase. *Nat Commun* 11: 610**

Google Scholar: [Author Only](#) [Title Only](#) [Author and Title](#)

**Peltier G, Aro EM, Shikanai T (2016) NDH-1 and NDH-2 plastoquinone reductases in oxygenic photosynthesis. *Annu Rev Plant Biol* 67: 55-80**

Google Scholar: [Author Only](#) [Title Only](#) [Author and Title](#)

**Peterson RB, Schultes NP, McHale NA, Zelitch I (2016) Evidence for a role for NAD(P)H dehydrogenase in concentration of CO<sub>2</sub> in the bundle sheath cell of *Zea mays*. *Plant Physiol* 171: 125-138**

Google Scholar: [Author Only](#) [Title Only](#) [Author and Title](#)

**Porra RJ, Thompson WA, Kriedemann PE (1989) Determination of accurate extinction coefficients and simultaneous equations for assaying chlorophyll a and b extracted with four different solvents: verification of the concentration of chlorophyll standards by atomic absorption spectroscopy. *Biochim Biophys Acta* 975: 384-394**

Google Scholar: [Author Only](#) [Title Only](#) [Author and Title](#)

**Pribil M, Labs M, Leister D (2014) Structure and dynamics of thylakoids in land plants. *J Exp Bot* 65:1955-1972**

Google Scholar: [Author Only](#) [Title Only](#) [Author and Title](#)

**Ruban AV (2016) Nonphotochemical chlorophyll fluorescence quenching: mechanism and effectiveness in protecting plants from photodamage. *Plant Physiol* 170: 1903-1916**

Google Scholar: [Author Only](#) [Title Only](#) [Author and Title](#)

**Sage RF, Sage TL, Kocacinar F (2012) Photorespiration and the evolution of C4 photosynthesis. *Annu Rev Plant Biol* 63: 19-47**

Google Scholar: [Author Only](#) [Title Only](#) [Author and Title](#)

**Sanda S, Yoshida K, Kuwano M, Kawamura T, Munekage Y, Akashi K, Yokota A (2011) Response of the photosynthetic electron transport system to excess light energy caused by water deficient in wild watermelon. *Physiol Plantarum* 142: 247-264**

Google Scholar: [Author Only](#) [Title Only](#) [Author and Title](#)

**Schuller JM, Birrell JA, Tanaka H, Konuma T, Wulfhorst H, Cox N, Schuller SK, Thiemann J, Lubitz W, Sétif P, Ikegami T, Engel BD, Kurisu G, Nowaczyk MM (2019) Structural adaptations of photosynthetic complex I enable ferredoxin-dependent electron transfer. *Science* 363: 257-260**

Google Scholar: [Author Only](#) [Title Only](#) [Author and Title](#)

**Schuller JM, Saura P, Thiemann J, Schuller SK, Gamiz-Hernandez AP, Kurisu G, Nowaczyk MM, Kaila VRI (2020) Redox-coupled proton pumping drives carbon concentration in the photosynthetic complex I. *Nat Commun* 11: 494**

Google Scholar: [Author Only](#) [Title Only](#) [Author and Title](#)

**Shikanai T (2007) Cyclic electron transport around photosystem I: genetic approaches. *Annu Rev Plant Biol* 58: 199-217**

Google Scholar: [Author Only](#) [Title Only](#) [Author and Title](#)

**Suorsa M, Järvi S, Grieco M, Nurmi M, Pietrzykowska M, Rantala M, Kangasjärvi S, Paakkarinen V, Tikkanen M, Jansson S, Aro EM (2012) PROTON GRADIENT REGULATION5 is essential for proper acclimation of Arabidopsis photosystem I to naturally and artificially fluctuating light conditions. *Plant Cell* 24: 2934-2948**

Google Scholar: [Author Only](#) [Title Only](#) [Author and Title](#)

**Takabayashi A, Kishine M, Asada K, Endo T, Sato F (2005) Differential use of two cyclic electron flows around photosystem I for driving CO<sub>2</sub>-concentration mechanism in C<sub>4</sub> photosynthesis. *Proc Natl Acad Sci USA* 102: 16898-16903**

Google Scholar: [Author Only](#) [Title Only](#) [Author and Title](#)

**Taniguchi YY, Gowik U, Kinoshita Y, Kishizaki R, Ono N, Yokota A, Westhoff P, Munekage YN (2021) Dynamic changes of genome sizes and gradual gain of cell-specific distribution of C<sub>4</sub> enzymes during C<sub>4</sub> evolution in genus *Flaveria*. *Plant Genome*: e20095**

Google Scholar: [Author Only](#) [Title Only](#) [Author and Title](#)

**Tazoe Y, Ishikawa N, Shikanai T, Ishiyama K, Takagi D, Makino A, Sato F, Endo T (2020) Overproduction of PGR5 enhances the electron sink downstream of photosystem I in a C<sub>4</sub> plant, *Flaveria bidentis*. *Plant J* 103: 814-823**

Google Scholar: [Author Only](#) [Title Only](#) [Author and Title](#)

**von Caemmerer S, Furbank RT (1999) Modeling C<sub>4</sub> photosynthesis. In RF Sage and RK Monson, eds, *C<sub>4</sub> Plant Biology*. Academic Press, USA, pp 173-211**

Google Scholar: [Author Only](#) [Title Only](#) [Author and Title](#)

**von Caemmerer S, Furbank RT (2003) The C<sub>4</sub> pathway: an efficient CO<sub>2</sub> pump. *Photosynth Res* 77: 191-207**

Google Scholar: [Author Only](#) [Title Only](#) [Author and Title](#)

**Woo KC, Anderson JM, Boardman NK, Downton WJ, Osmond CB, Thorne SW (1970) Deficient photosystem II in agranal bundle sheath chloroplasts of C<sub>4</sub> plants. *Proc Natl Acad Sci USA* 67: 18-25**

Google Scholar: [Author Only](#) [Title Only](#) [Author and Title](#)

**Yamamoto H, Shikanai T (2013) In planta mutagenesis of Src homology 3 domain-like fold of NdhS, a ferredoxin-binding subunit of the chloroplast NADH dehydrogenase-like complex in Arabidopsis. *J Biol Chem* 288: 36328-36337**

Google Scholar: [Author Only](#) [Title Only](#) [Author and Title](#)

**Yamori W, Sakata N, Suzuki Y, Shikanai T, Makino A (2011) Cyclic electron flow around photosystem I via chloroplast NAD(P)H dehydrogenase (NDH) complex performs a significant physiological role during photosynthesis and plant growth at low temperature in rice. *Plant J* 68: 966-976**

Google Scholar: [Author Only](#) [Title Only](#) [Author and Title](#)

**Yamori W, Shikanai T (2016) Physiological function of cyclic electron transport around photosystem I in sustaining photosynthesis and plant growth. *Annu Rev Plant Biol* 67: 81-106**

Google Scholar: [Author Only](#) [Title Only](#) [Author and Title](#)

**Yamori W, Makino A, Shikanai T (2016) A physiological role of cyclic electron transport around photosystem I in sustaining photosynthesis under fluctuating light in rice. *Sci Rep* 6: 20147**

Google Scholar: [Author Only](#) [Title Only](#) [Author and Title](#)

**Wang C, Yamamoto H, Shikanai T (2015) Role of cyclic electron transport around photosystem I in regulating proton motive force. *Biochim Biophys Acta* 1847: 931-938**

Google Scholar: [Author Only](#) [Title Only](#) [Author and Title](#)

**Wingler A, Walker RP, Chen Z-H, Leegood RC (1999) Phosphoenolpyruvate carboxykinase is involved in the decarboxylation of aspartate in the bundle sheath of maize. *Plant Physiol* 120: 539-545**

Google Scholar: [Author Only](#) [Title Only](#) [Author and Title](#)
